# Supplementary material for: Methanogens predominate in natural corrosion protective layers on metal sheet piles
Source: PubMed Central journal article supplement (PMC5605657; doi:10.1038/s41598-017-11244-7), 2017-09-19
Supplement: 41598_2017_11244_MOESM1_ESM.pdf [file 41598_2017_11244_MOESM1_ESM.pdf]

# Methanogens predominate in natural corrosion protective layers on metal sheet piles

Nardy Kip<sup>1</sup>, Stefan Jansen<sup>2</sup>, Marcio F.A. Leite<sup>1</sup>, Mattias de Hollander<sup>1</sup>, Michael Afanasyev<sup>3</sup>, Eiko E. Kuramae<sup>1</sup> and Johannes A. van Veen<sup>1\*</sup>

<sup>1</sup>Department of Microbial Ecology, Netherlands Institute of Ecology (NIOO-KNAW),  
Droevendaalsesteeg 10, 6708 PB, Wageningen, the Netherlands.

<sup>2</sup>Deltares, Princetonlaan 6, 3584 CB Utrecht, the Netherlands

<sup>3</sup> Department of Geoscience & Engineering, Delft University of Technology, Stevinweg 1, 2628 CN  
Delft, the Netherlands

\*Corresponding author: Hans van Veen [H.vanVeen@nioo.knaw.nl](mailto:H.vanVeen@nioo.knaw.nl). Department of Microbial Ecology,  
Netherlands Institute of Ecology (NIOO-KNAW), Wageningen, the Netherlands. Telephone: +31  
(0)317 473 475

Supplementary Information

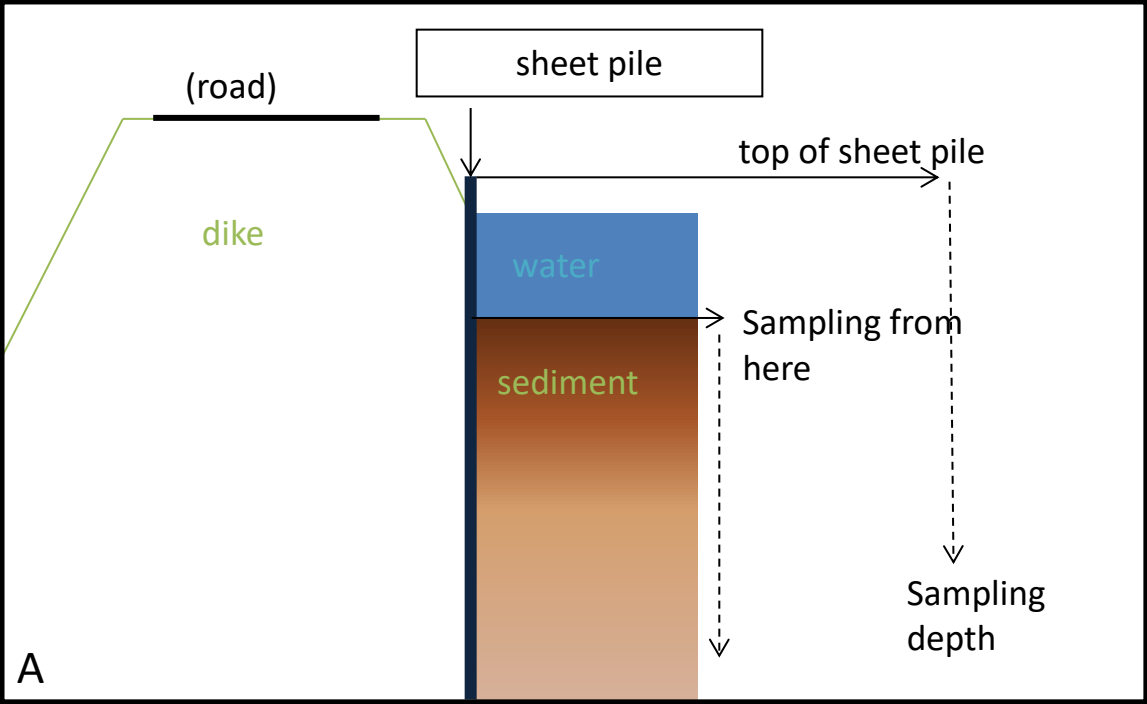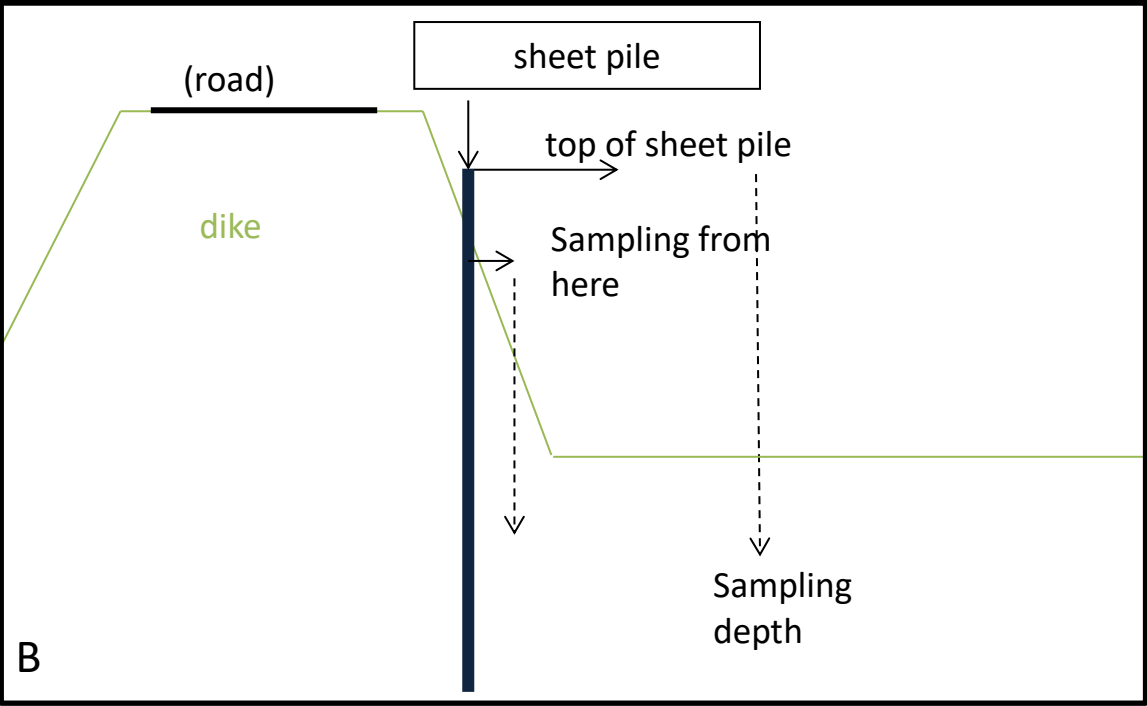

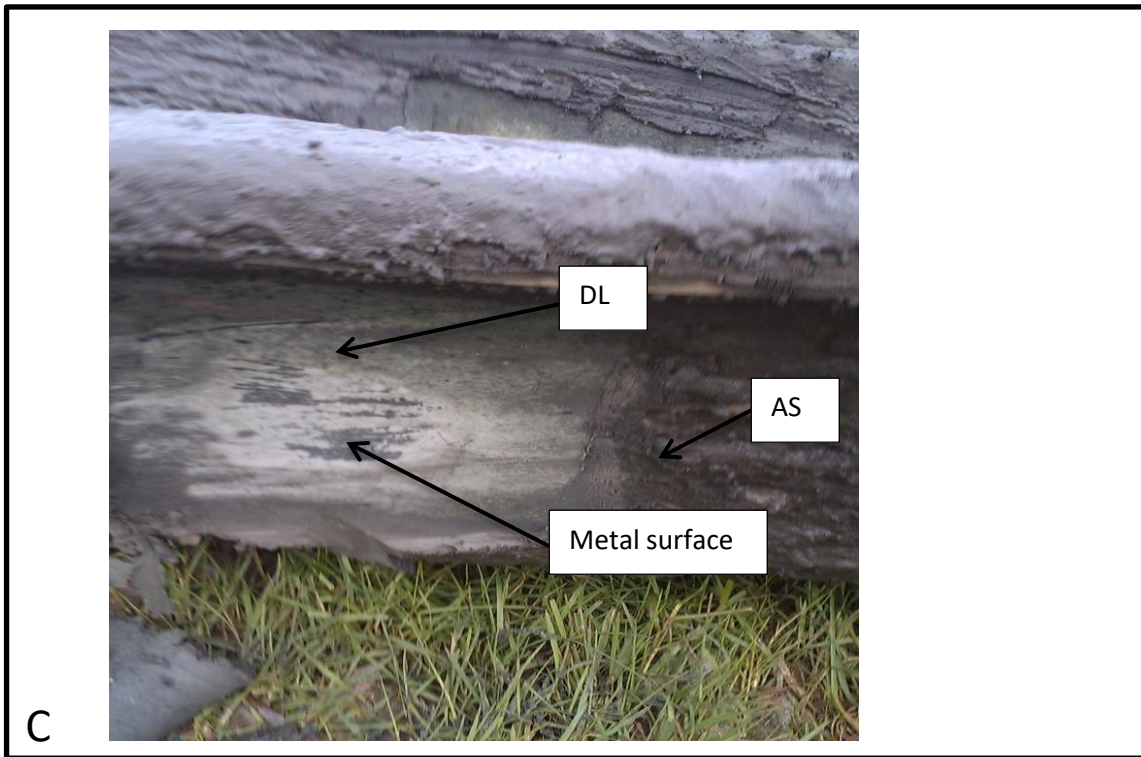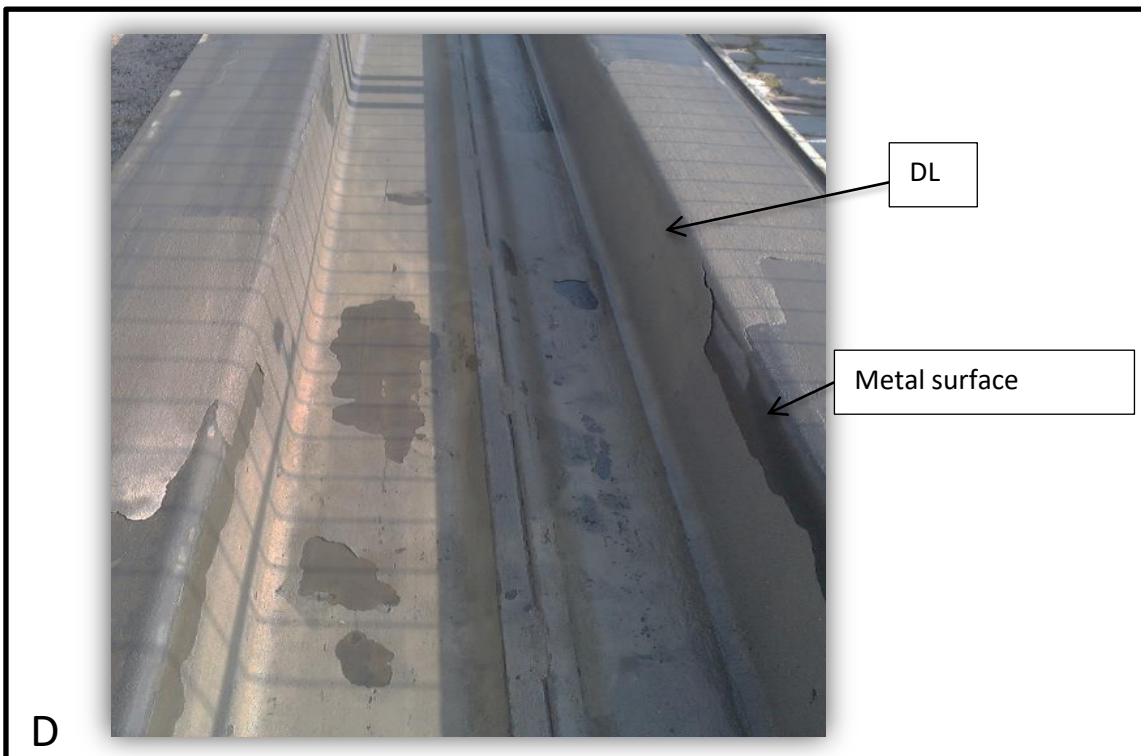

Figure S1. Schematic overview of how metal sheet piles are used to reinforce a waterway (A) and a dike (B). Photos of sheet pile with a mineral deposition layer. C: Sheet pile with attached soil and mineral deposition layer at Site NLL. D: very thick mineral deposition layer at site WK. DL=Deposition layer, AS=attached soil

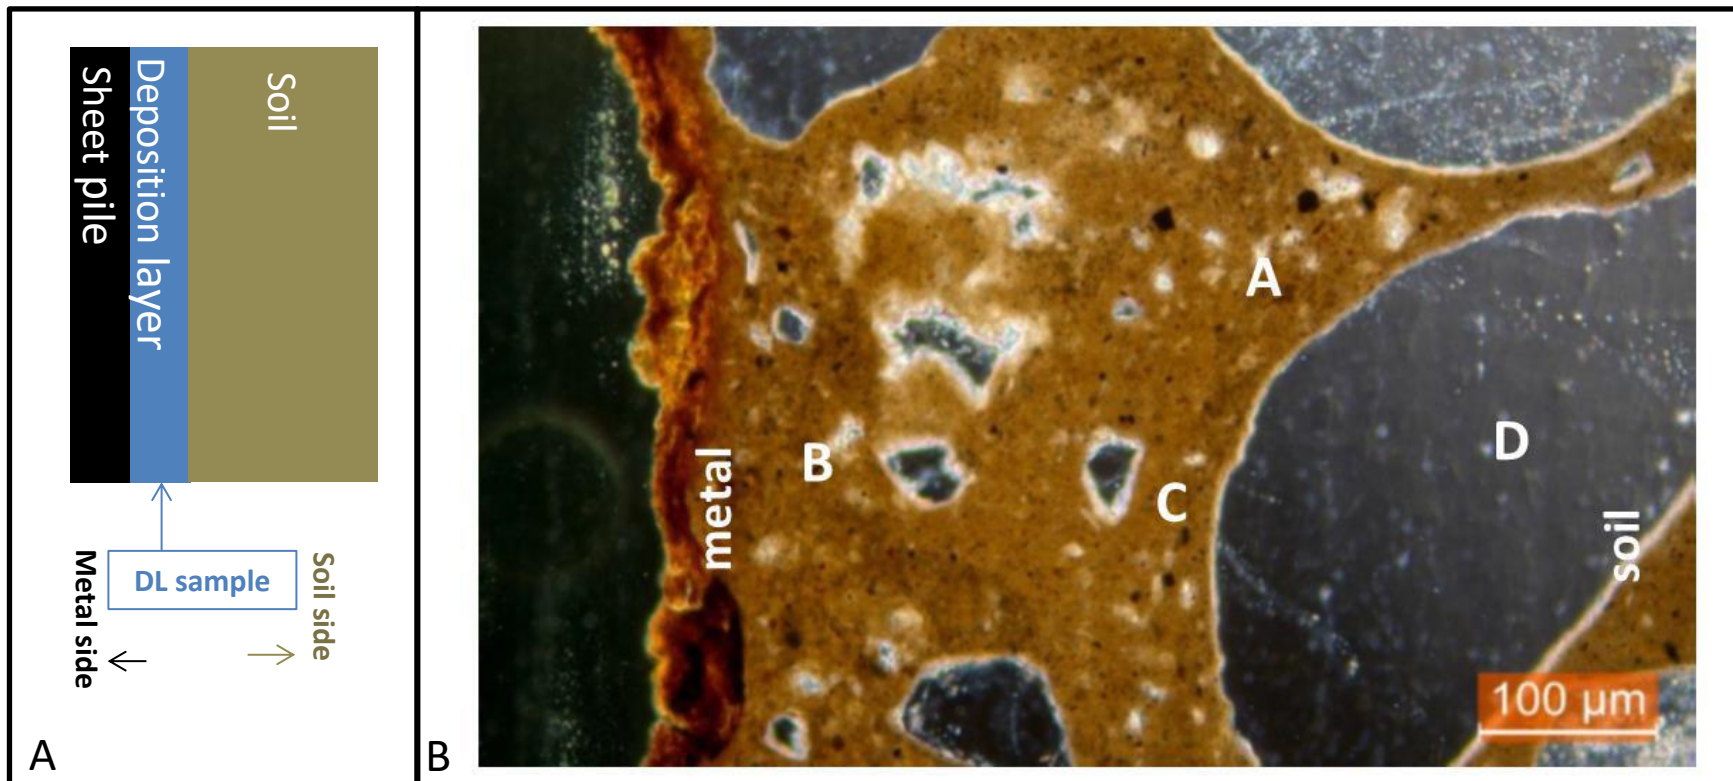

Figure S2. A: Schematic overview of the positioning of the DL sample. Only the deposition layer was looked at under the microscope. B: Phase contrast micrograph of a cross section of the deposition layer from the Westerkade site. A dense, iron rich, layer on the metal side and a more porous layer on the soil side are visible. Explanation of the letters within figureS2B: A: quartz mineral, B: dense layer, C: porous layer, D: sand grain

### A. Archaeal classes

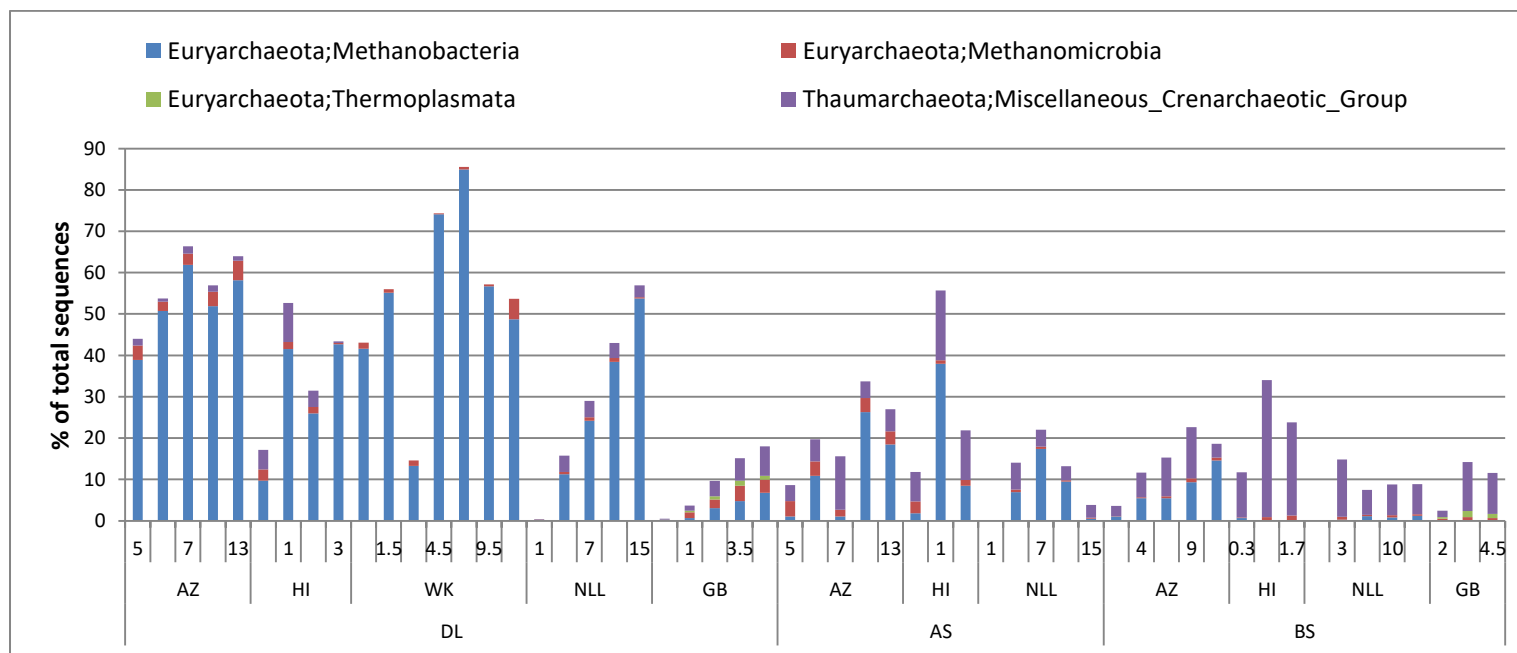

B. Proteobacterial classes

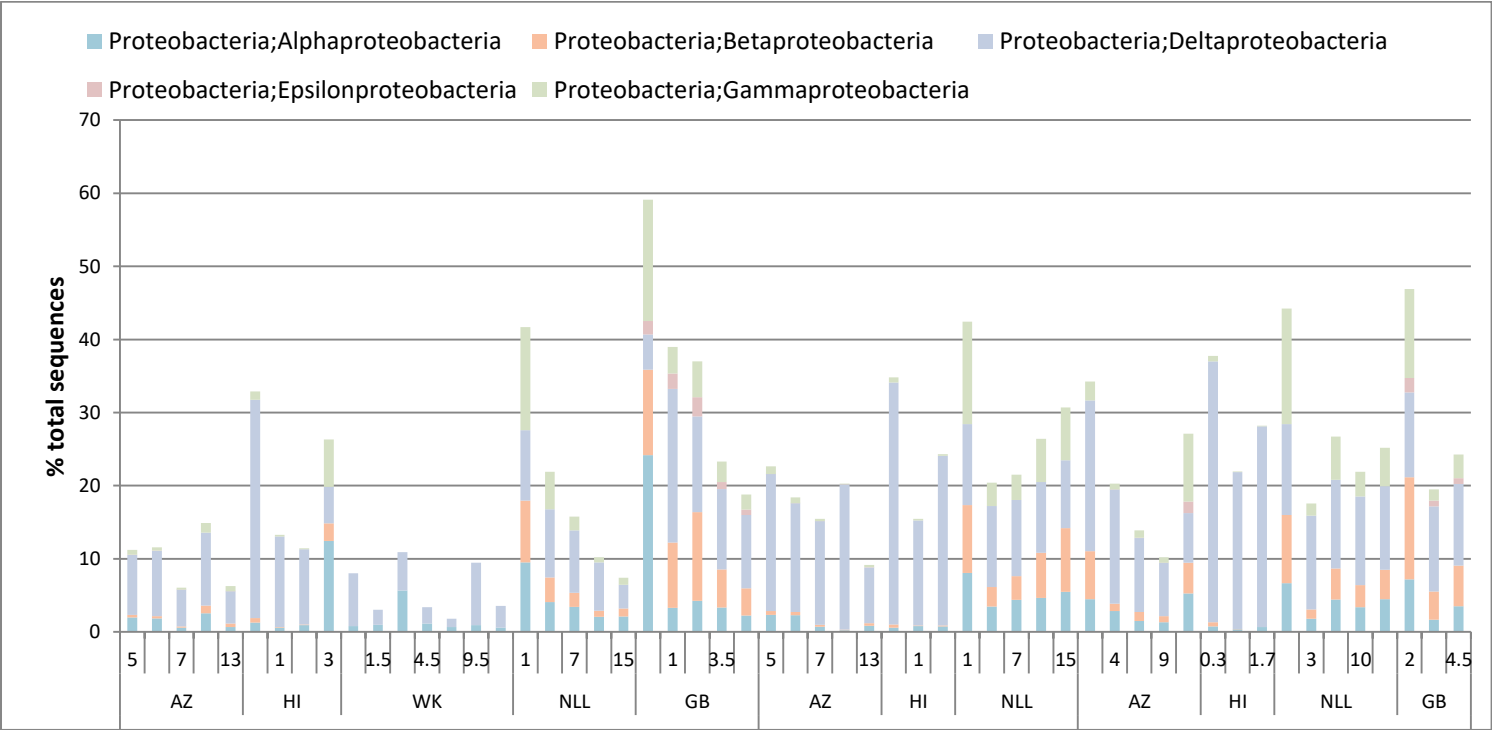

### C. Nitrospira classes

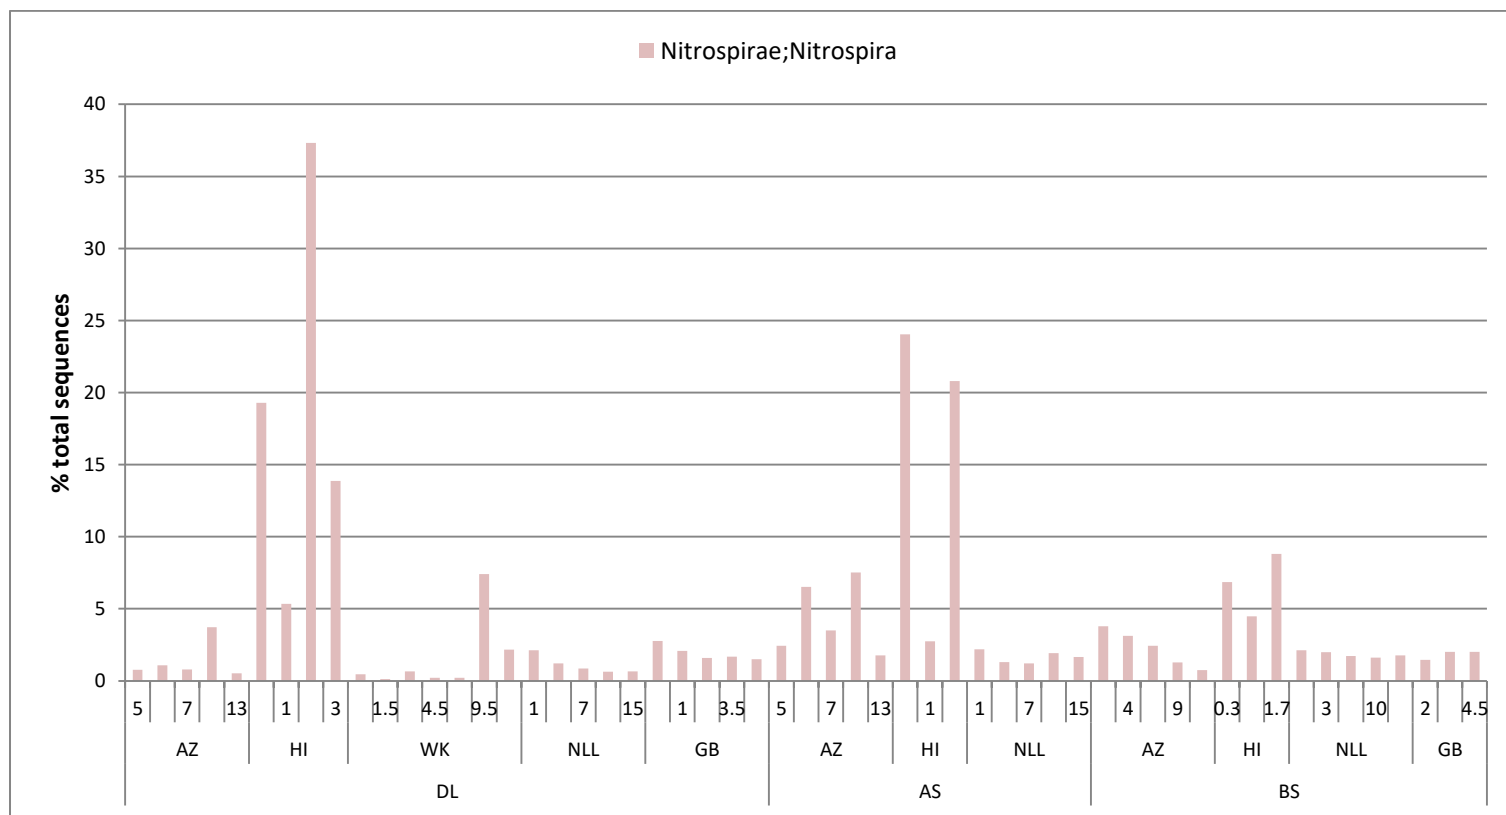

D. Acidobacterial and Actinobacterial classes

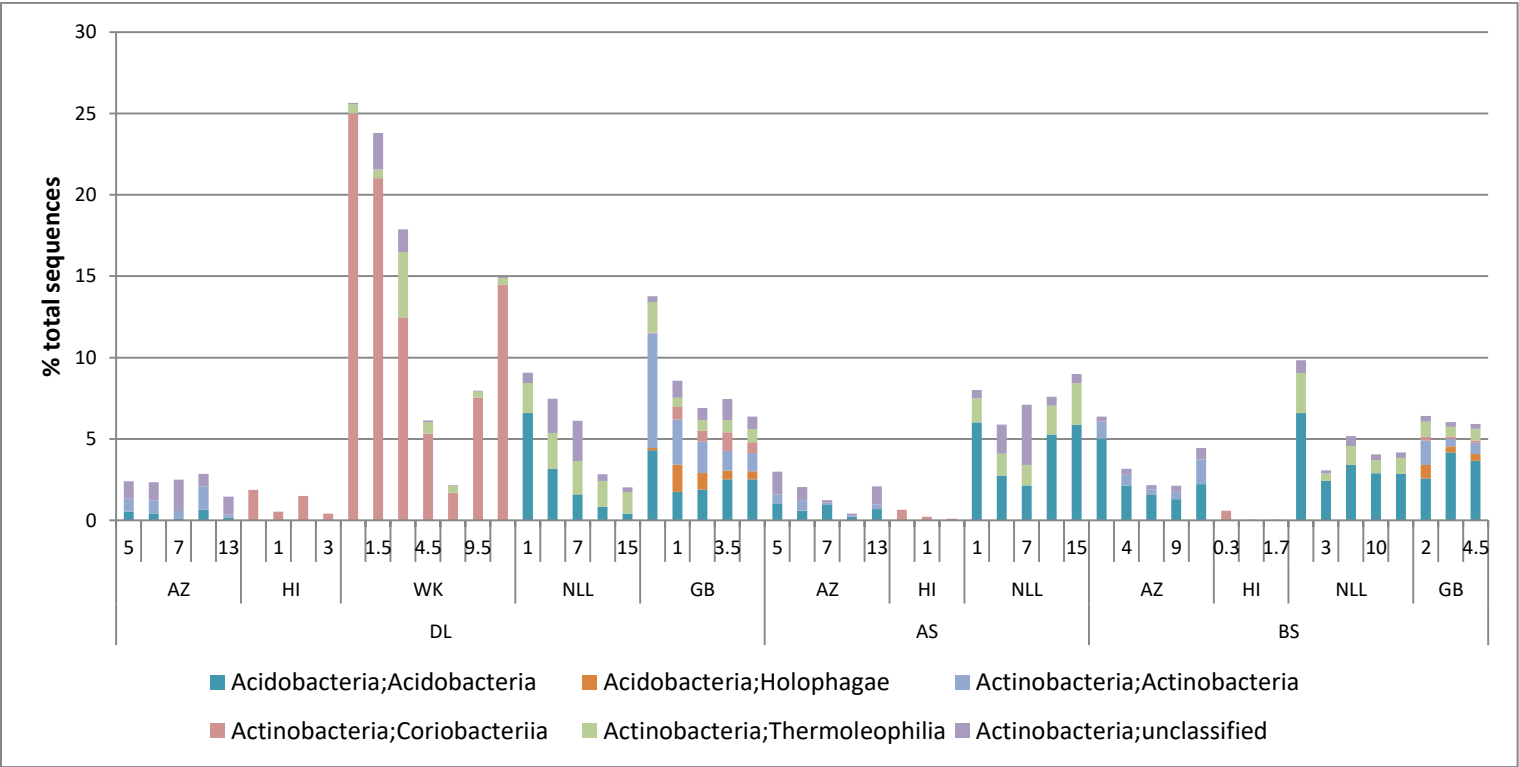



E. Chloroflexi classes

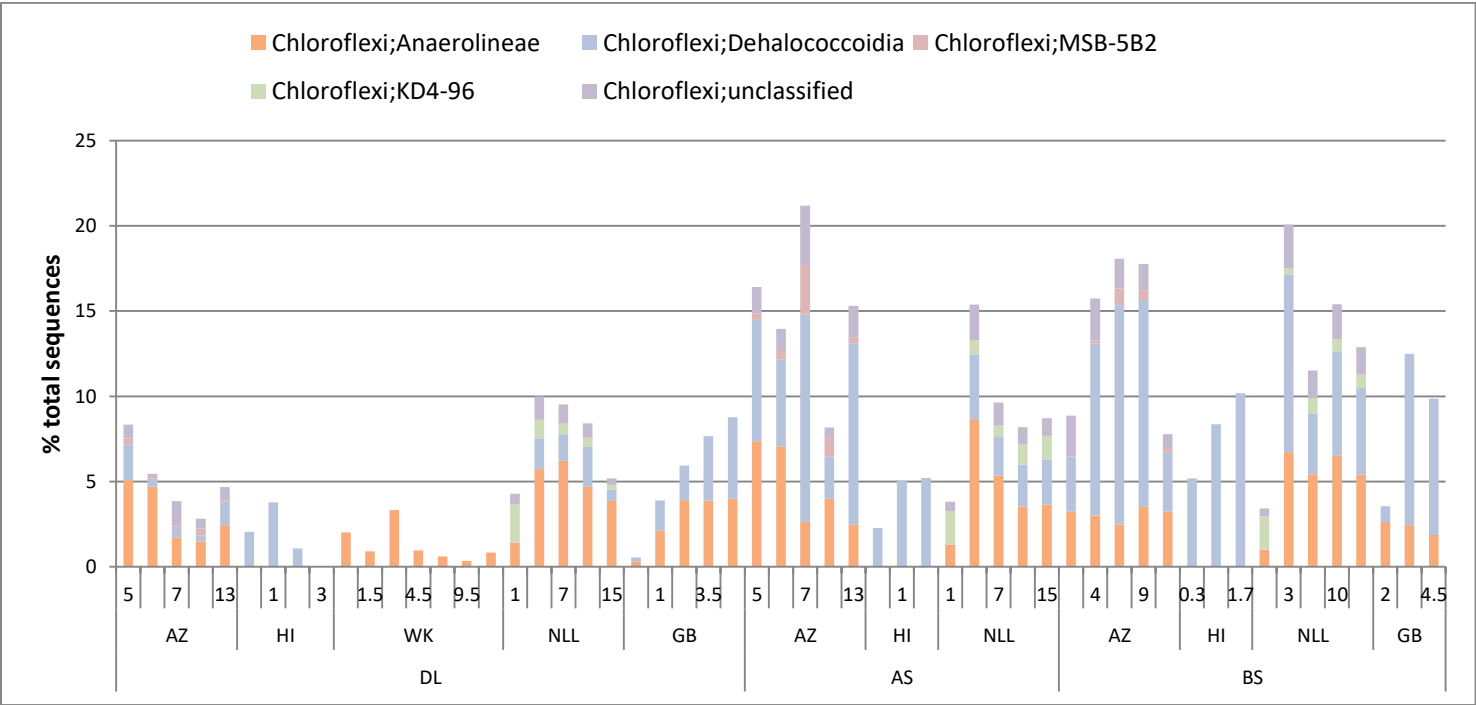

F. candidate division' classes

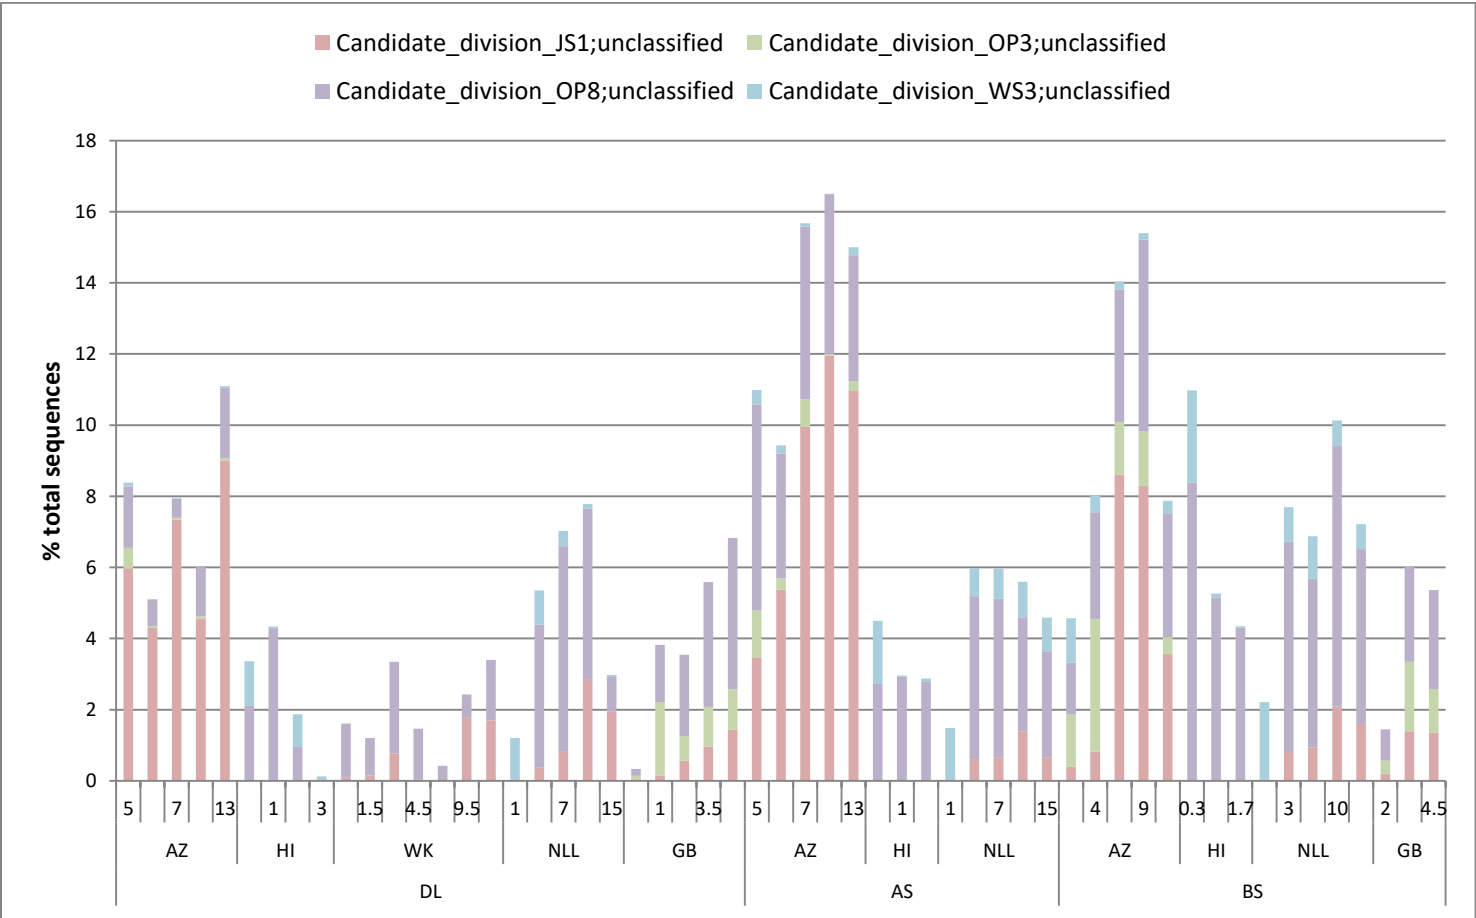

G. Bacteroidetes, Firmicutes, Planctomycetes and Gemmatimonadetes classes

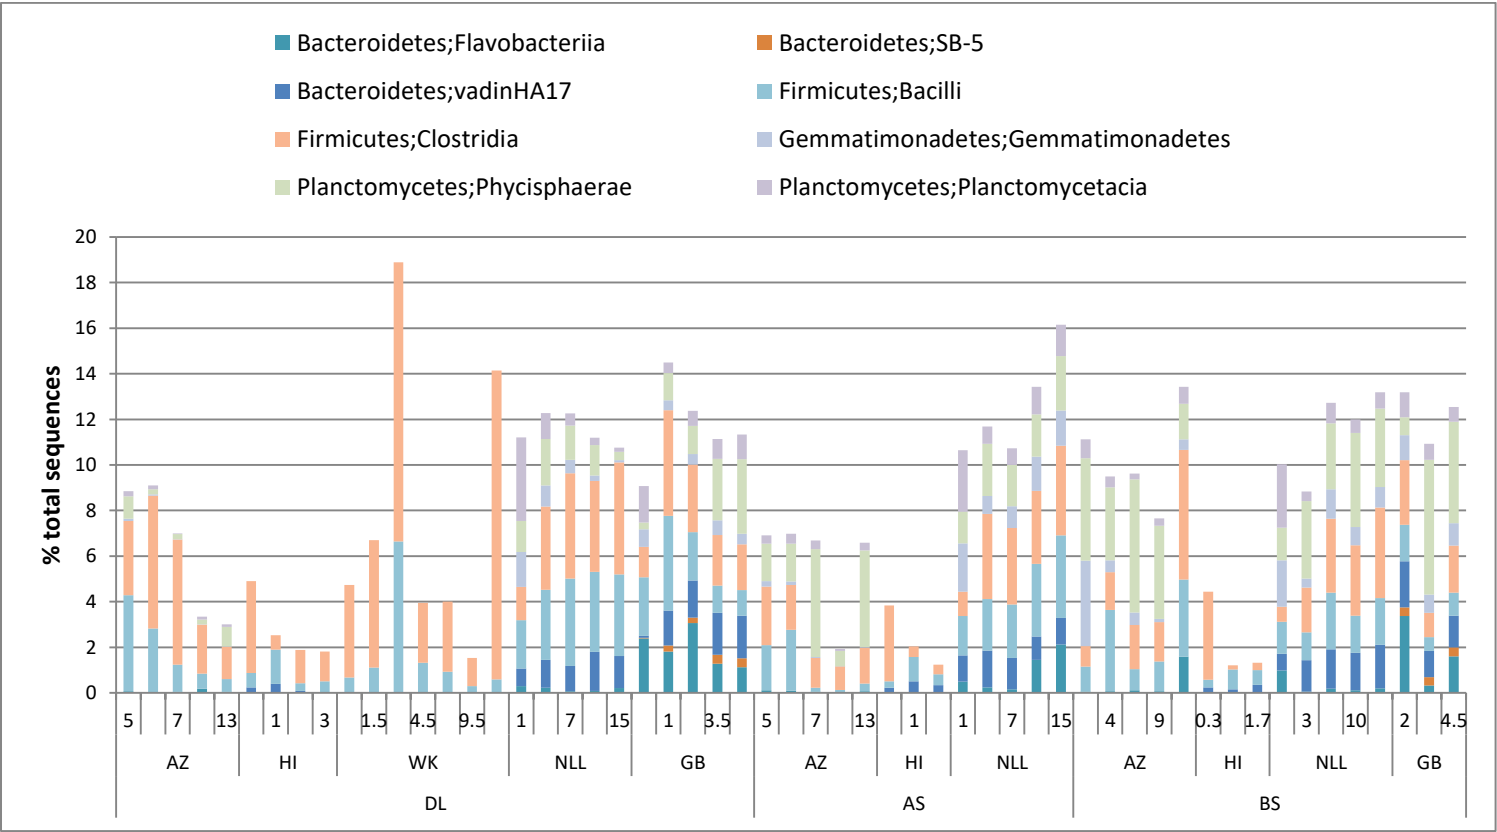

H. Spirochaetes and Verrucomicrobial classes and unclassified and unknown sequences

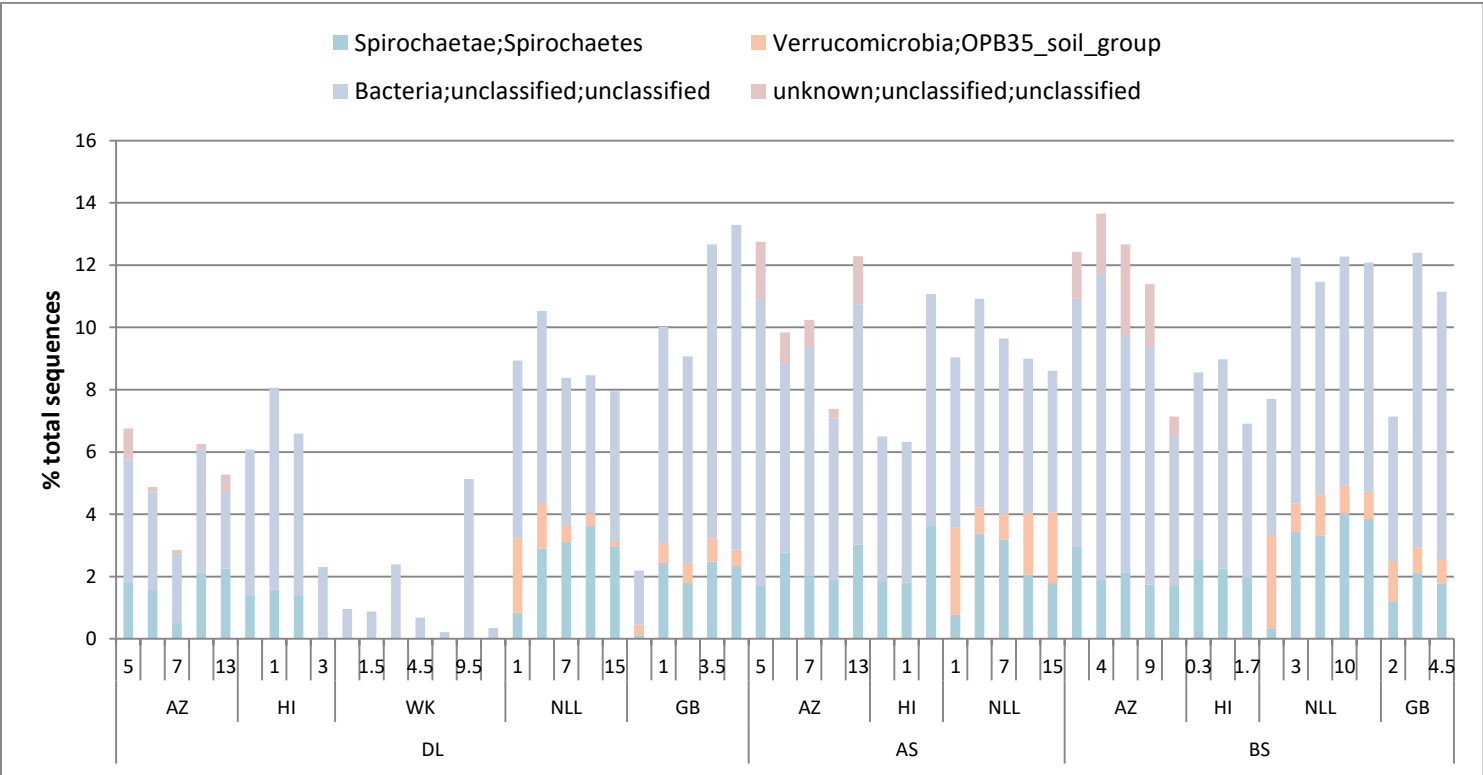

## I. All Classes

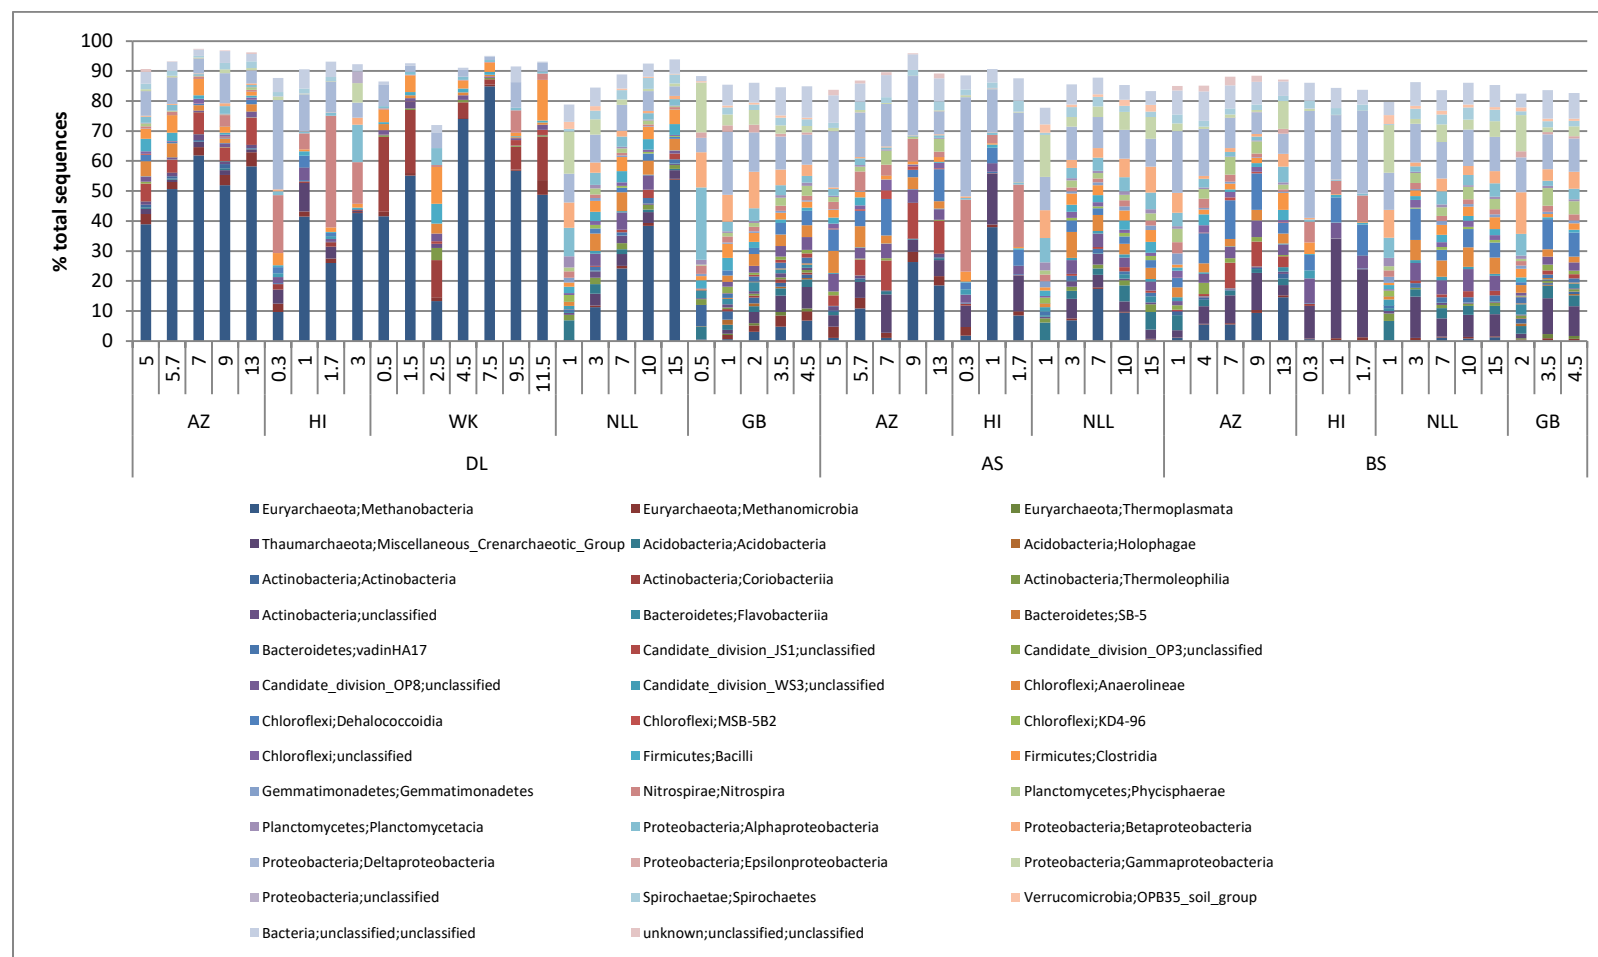

Supplementary Figure S3. Stacked diagrams of all the relative abundances of the different classes (averages, n=3). Only showing classes >2% in one sample or more.

### A. Archaeal genera

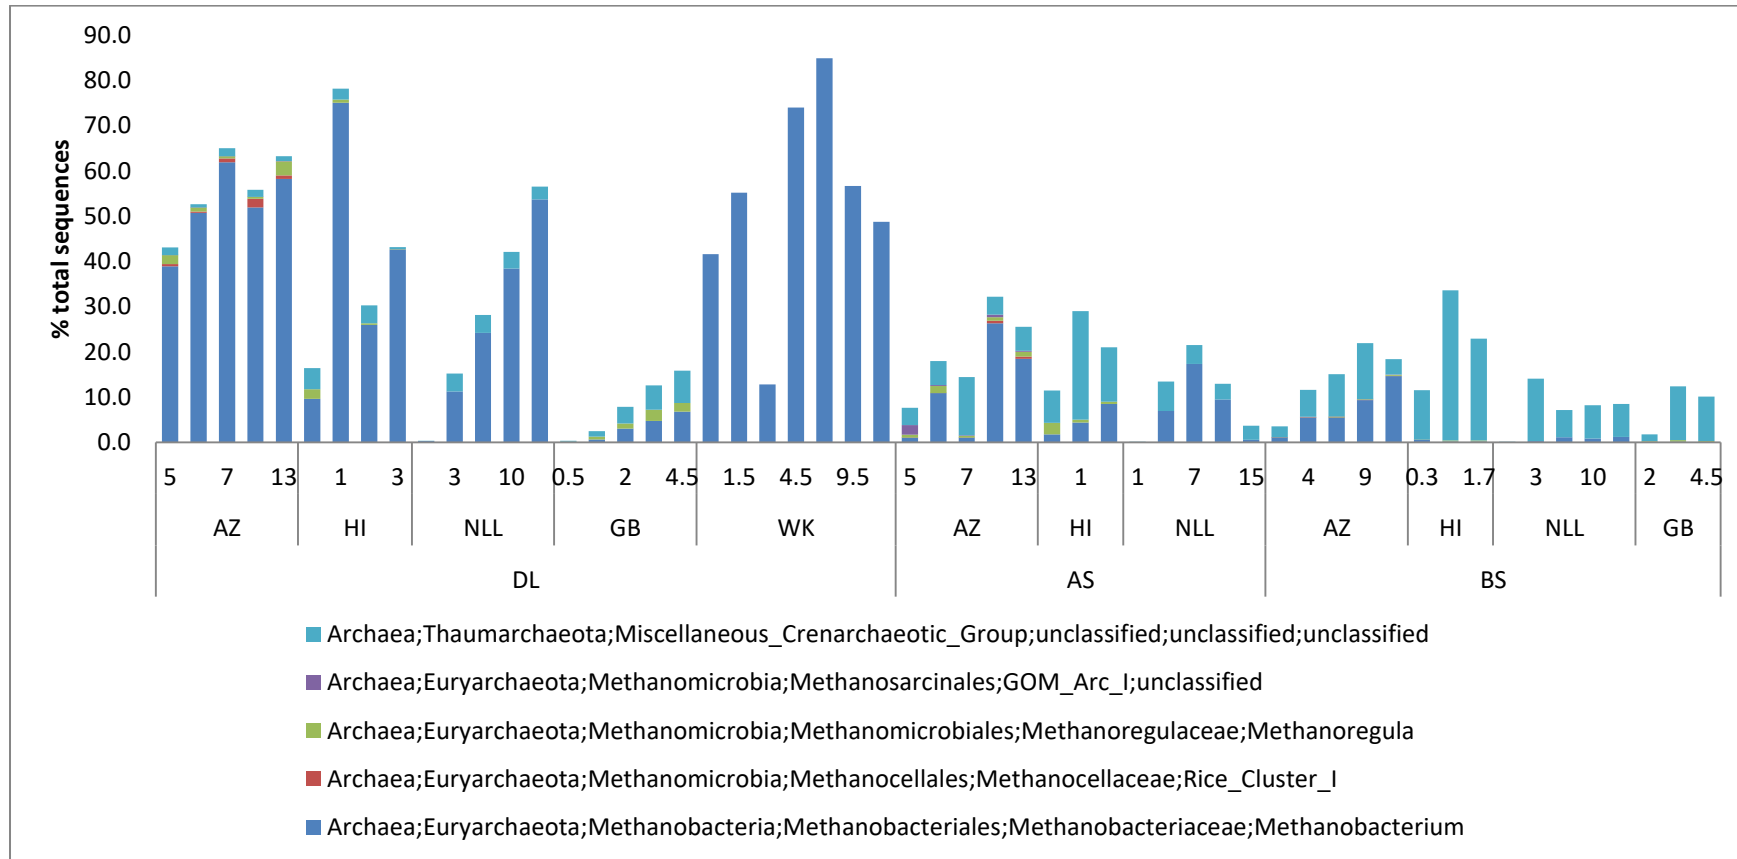

B. Alpha and Beta proteobacterial genera.

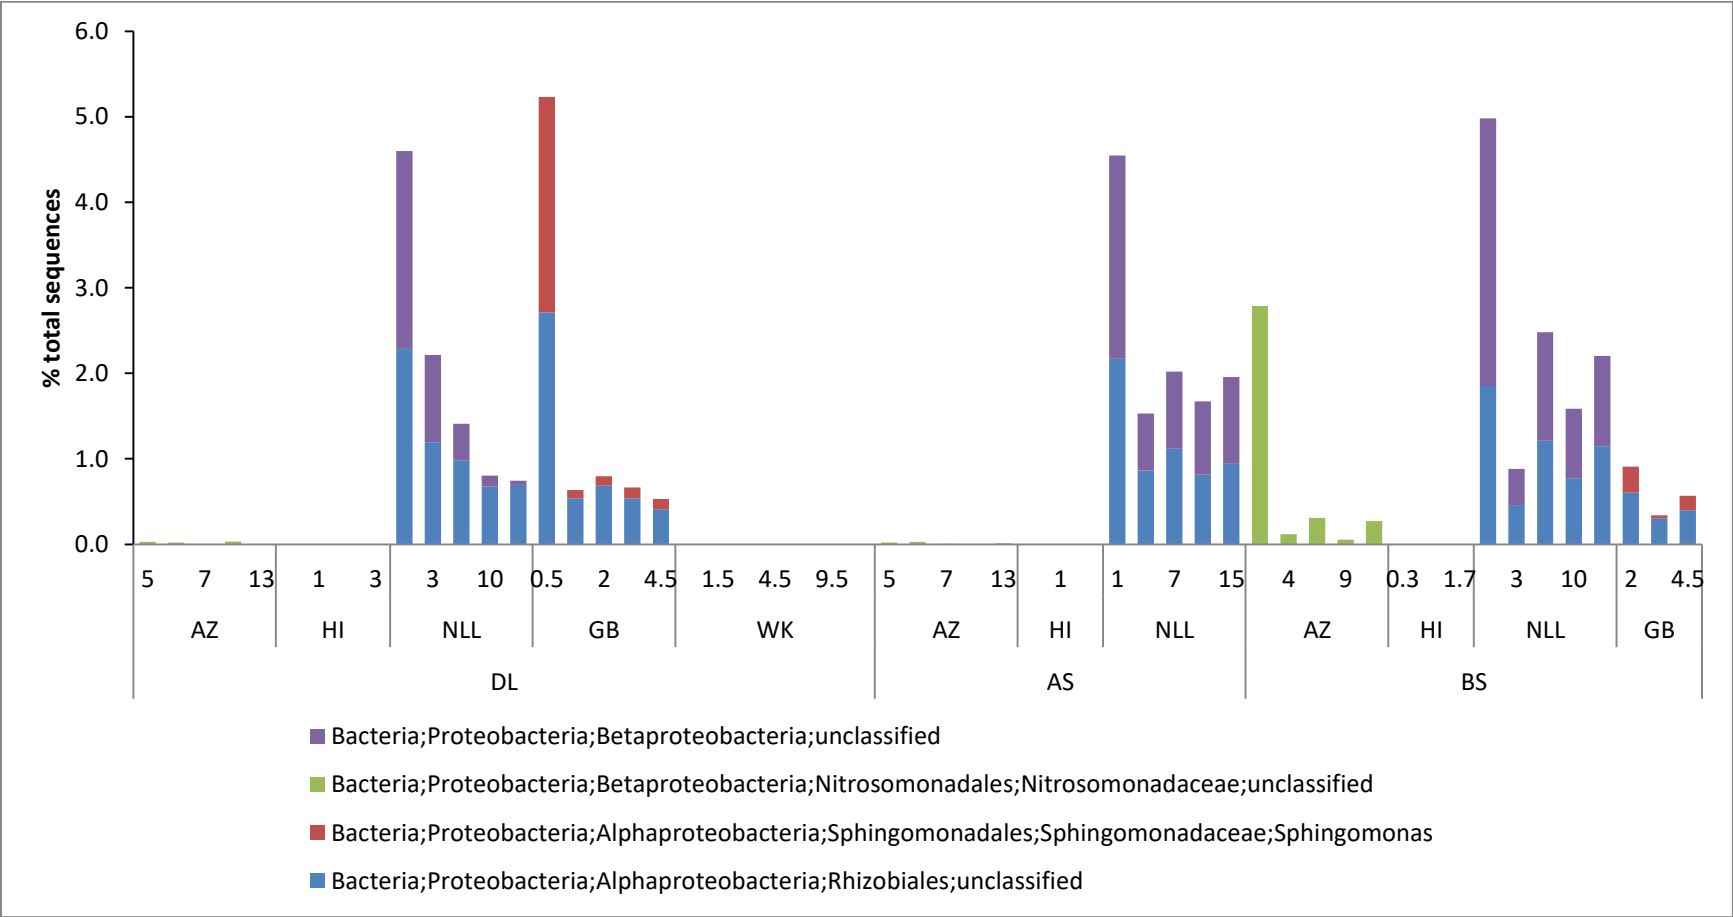

### C. Deltaproteobacterial genera

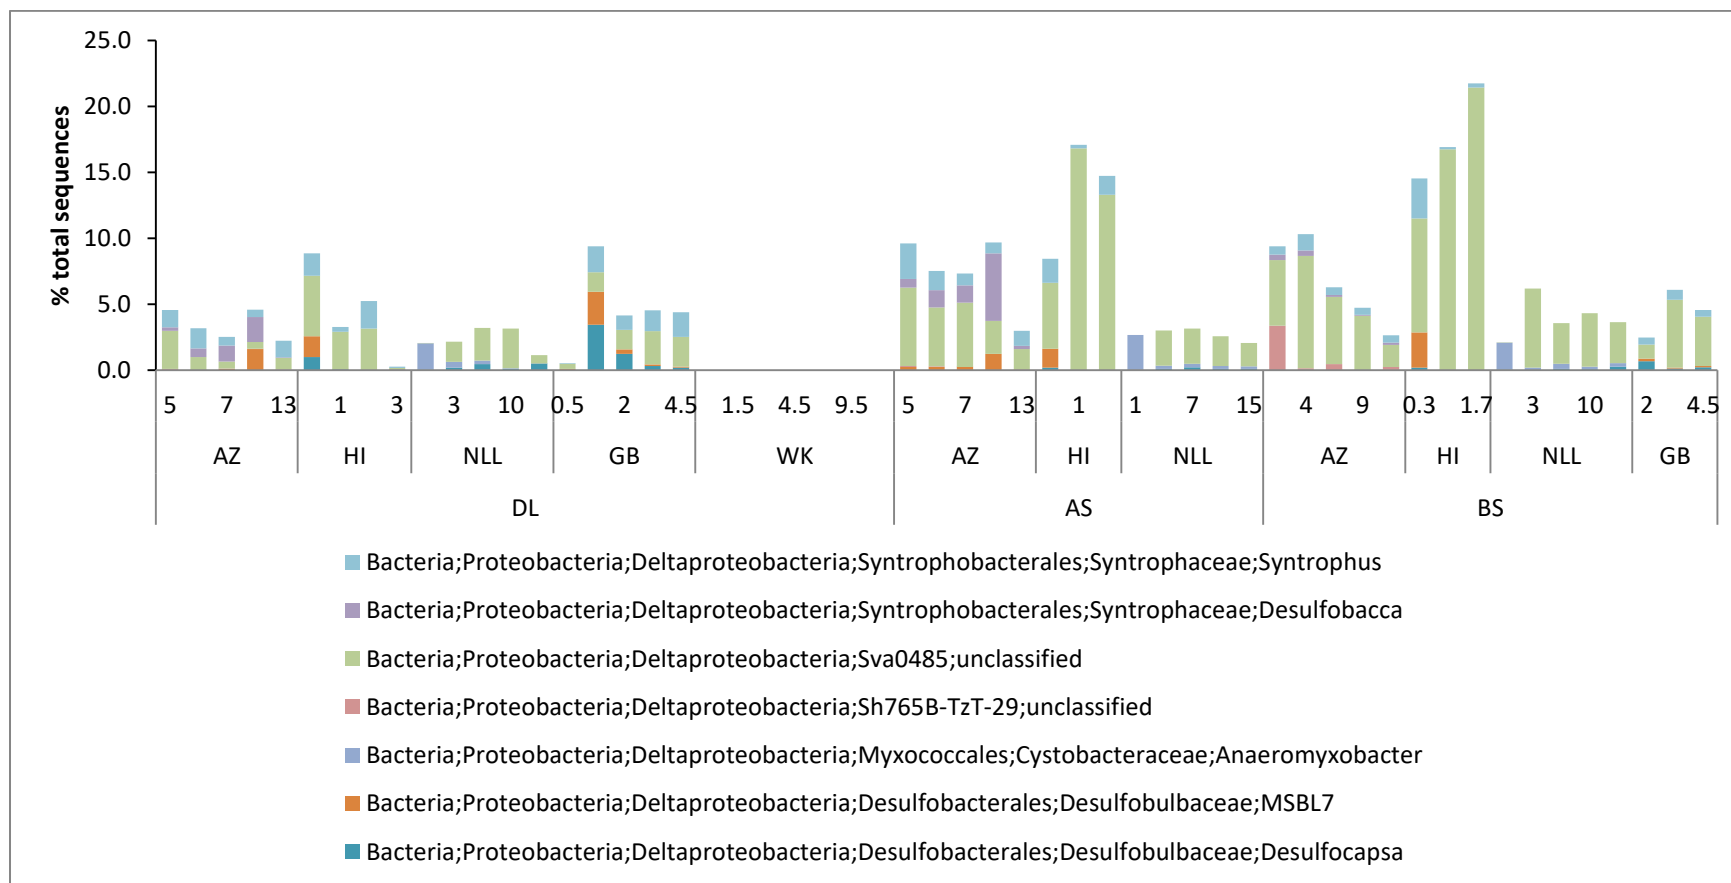



D. Gammaproteobacterial genera

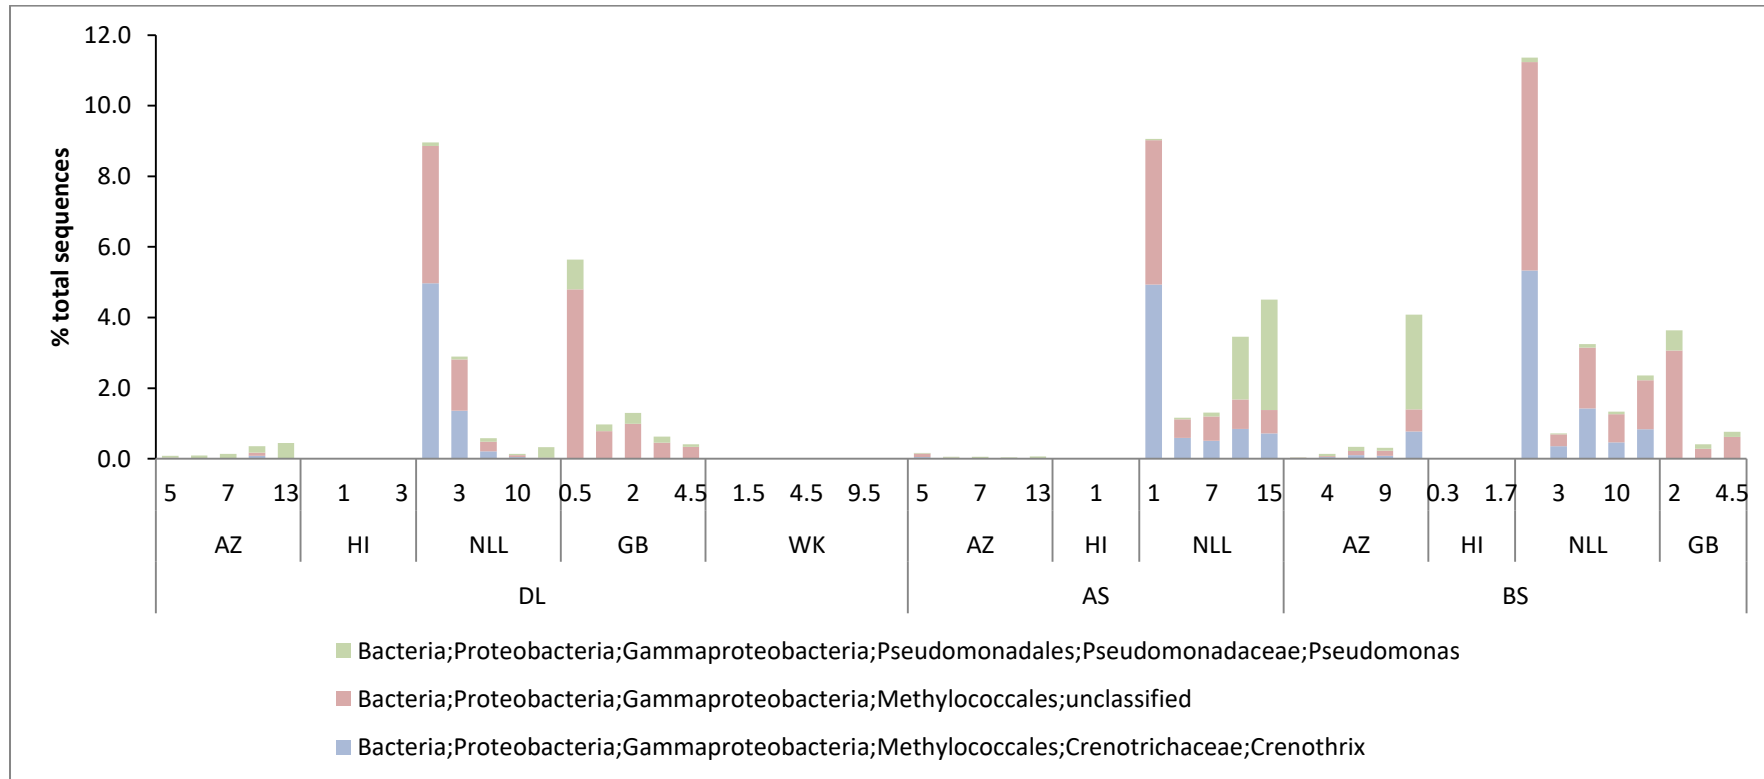

E. Nitrospira genera

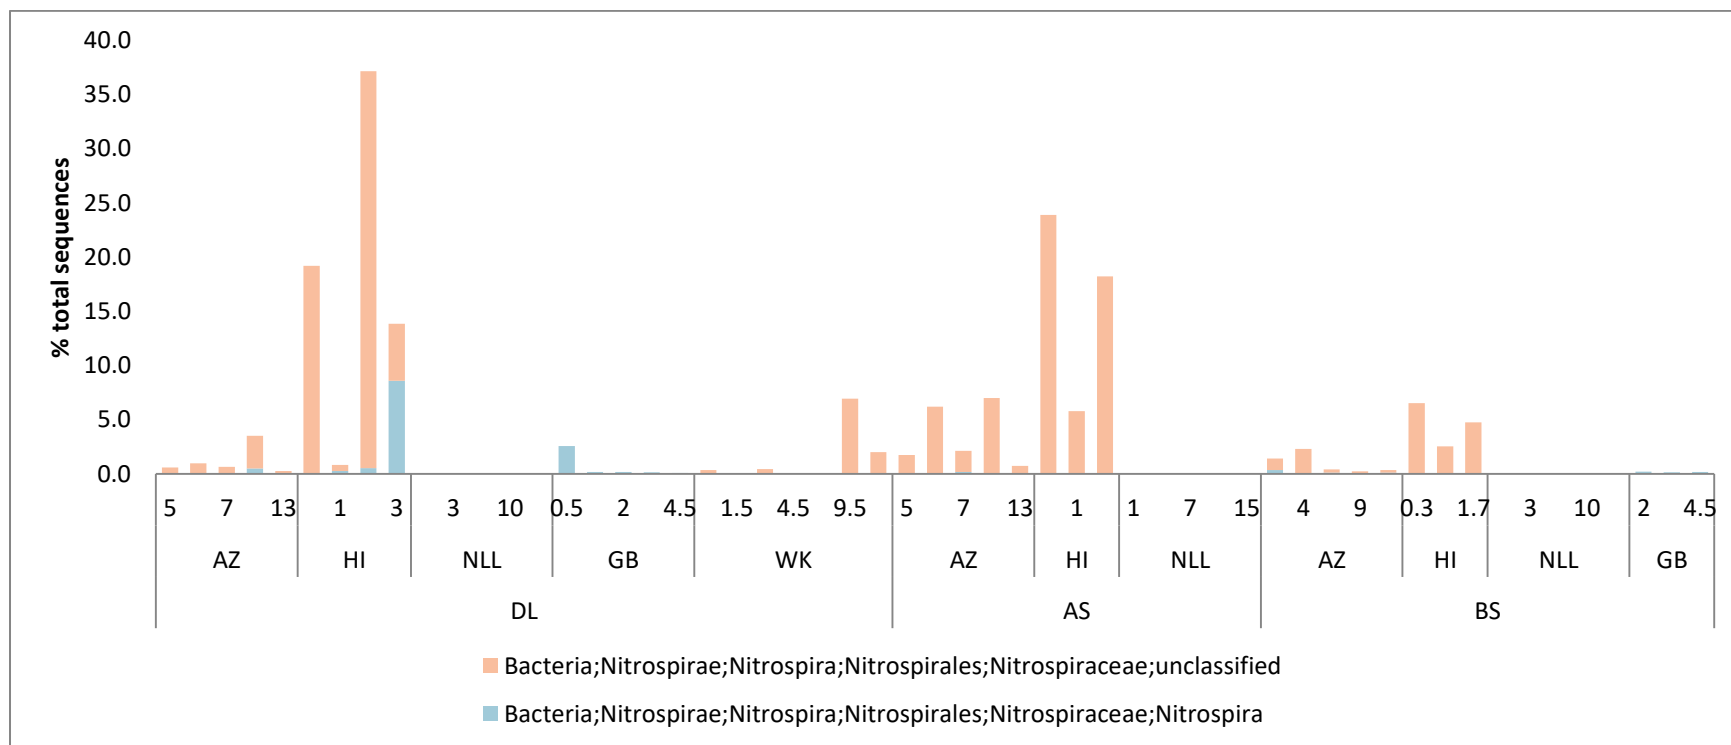

F. genera of Acino and Acidobacteria and Bacterioidetes and Candidate divisions.

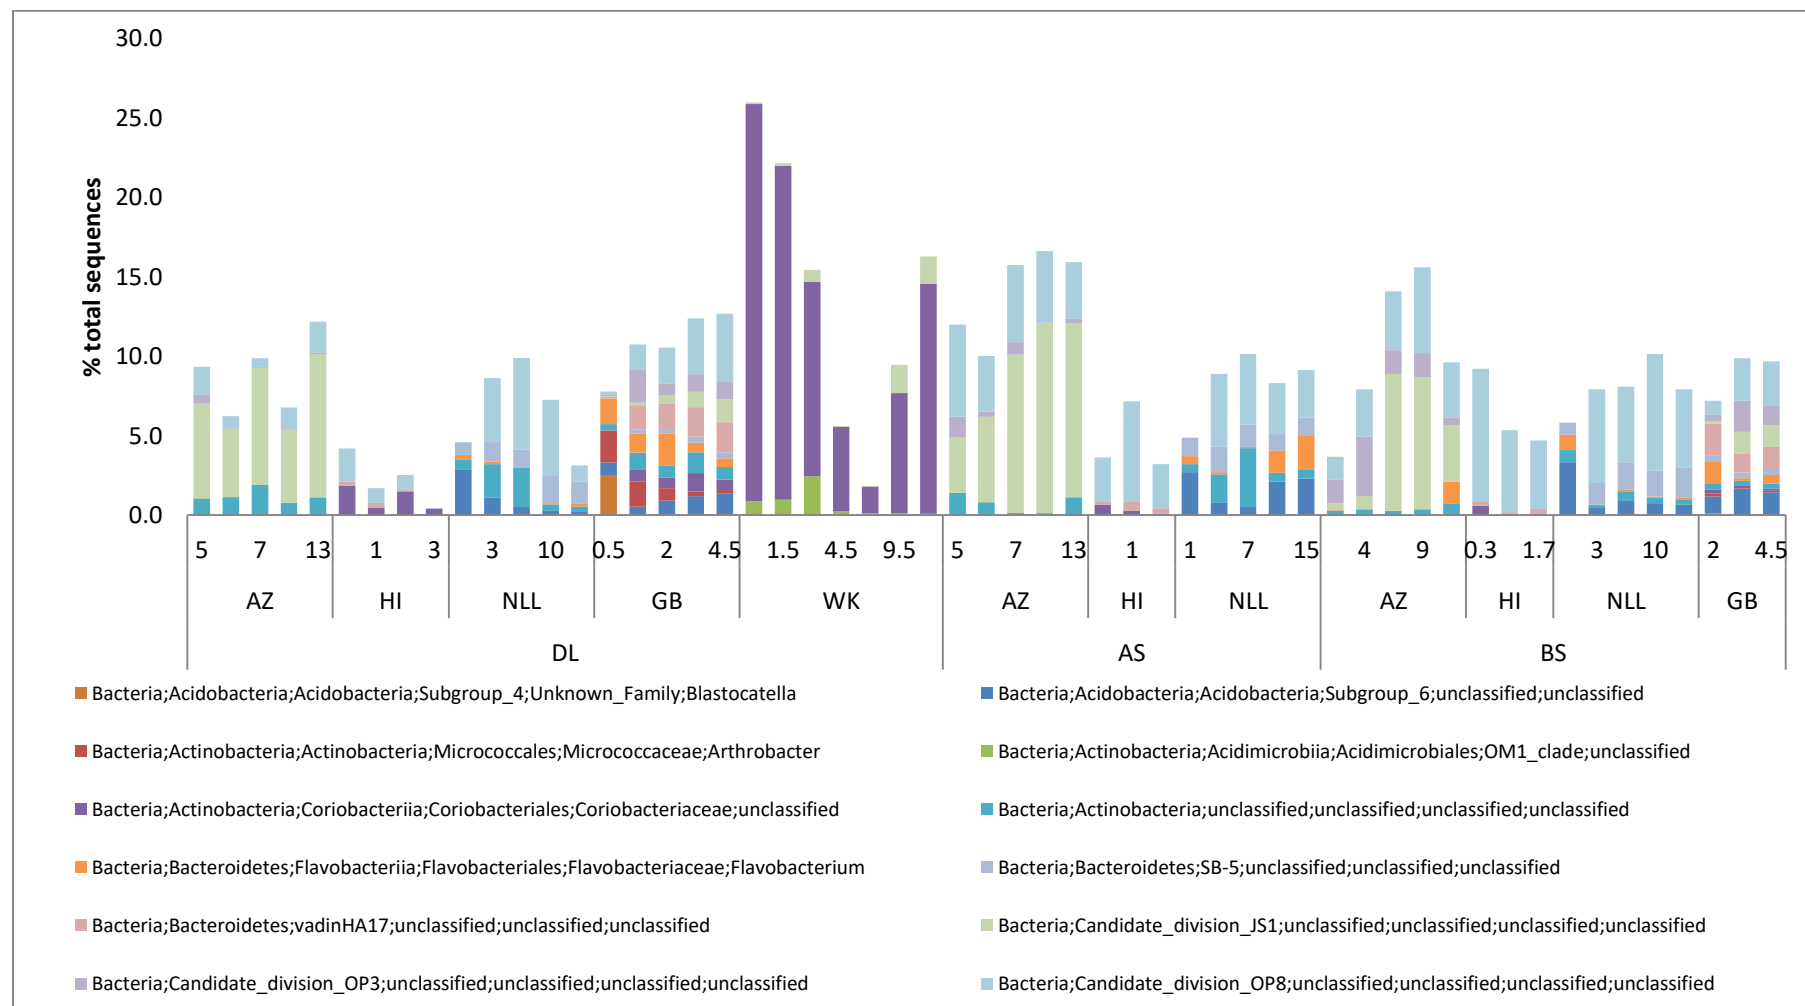

G. Classes of Chloroflexi, Firmicutes, Gemmatimonadetes and Planctomycetes.

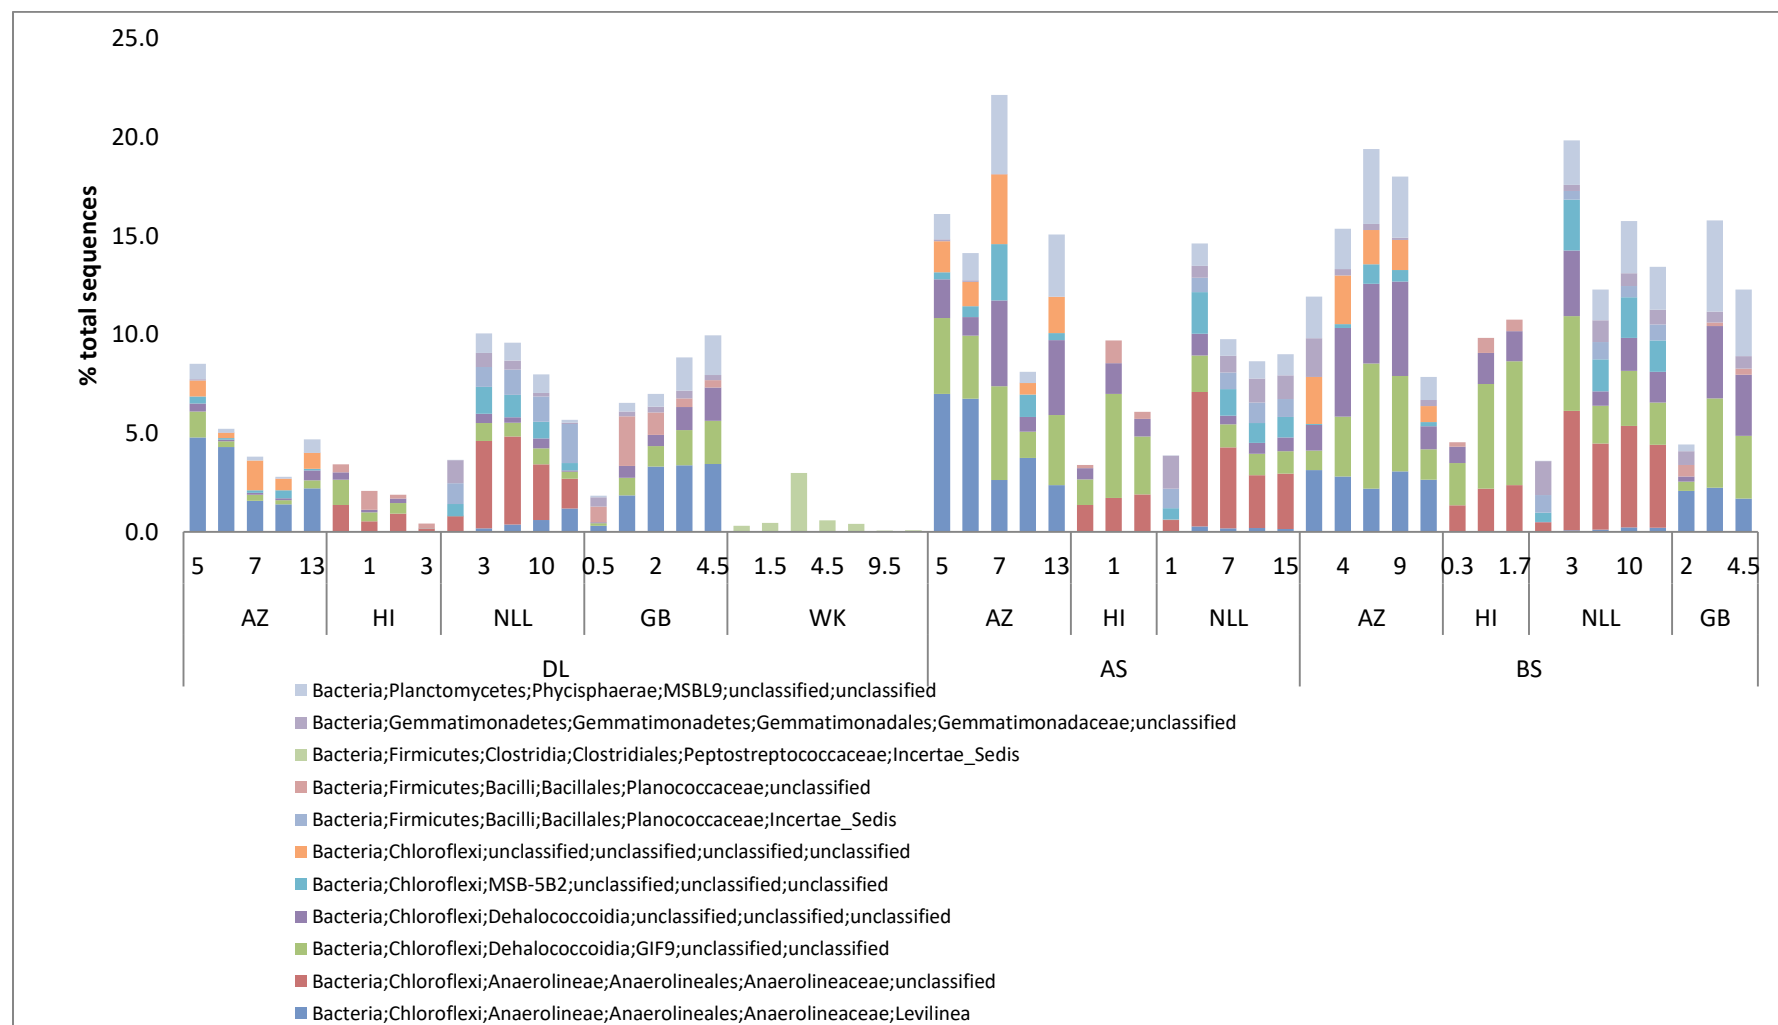

Supplementary Figure S4. Stacked diagrams of all the relative abundances of the different classes (averages, n=3). Only showing classes >2% in one sample or more.

**Supplementary Table S4.** Sample ID, treatment, total number of sequences and Good's coverage using DNA-based approach

| Sample ID                          | Sample Type | Depth (m) | Total number of sequences | Good's coverage |
|------------------------------------|-------------|-----------|---------------------------|-----------------|
| <b>Amsterdamse Zeeburgertunnel</b> |             |           |                           |                 |
| AZ12AA                             | BS          | 1         | 5642                      | 0.99185         |
| AZ12AB                             | BS          | 1         | 3262                      | 0.98437         |
| AZ12AC                             | BS          | 1         | 2441                      | 0.97542         |
| AZ12BA                             | BS          | 1         | 4064                      | 0.98597         |
| AZ12BB                             | BS          | 1         | 5703                      | 0.99369         |
| AZ12BC                             | BS          | 1         | 2168                      | 0.97509         |
| AZ12CA                             | BS          | 1         | 4226                      | 0.99006         |
| AZ12CB                             | BS          | 1         | 3461                      | 0.98584         |
| AZ12CC                             | BS          | 1         | 8808                      | 0.99546         |
| AZ1A2A                             | DP          | 5         | 2708                      | 0.97747         |
| AZ1A2B                             | DP          | 5         | 1852                      | 0.96706         |
| AZ1A2C                             | DP          | 5         | 3332                      | 0.98109         |
| AZ1BA                              | DP          | 5         | 5527                      | 0.9886          |
| AZ1BB                              | DP          | 5         | 5212                      | 0.98599         |
| AZ1BC                              | DP          | 5         | 2318                      | 0.97325         |
| AZ1C1A                             | AS          | 5         | 7844                      | 0.99159         |
| AZ1C1B                             | AS          | 5         | 3141                      | 0.97867         |
| AZ1C1C                             | AS          | 5         | 5473                      | 0.98977         |
| AZ1C2A                             | DP          | 5         | 886                       | 0.9526          |
| AZ1C2B                             | DP          | 5         | 1849                      | 0.97891         |
| AZ1C2C                             | DP          | 5         | 1304                      | 0.96472         |
| AZ22AA                             | BS          | 7         | 5626                      | 0.99271         |
| AZ22AB                             | BS          | 7         | 3968                      | 0.98916         |
| AZ22AC                             | BS          | 7         | 6461                      | 0.99087         |
| AZ22BA                             | BS          | 7         | 4560                      | 0.98969         |
| AZ22BB                             | BS          | 7         | 1502                      | 0.9747          |
| AZ22BC                             | BS          | 7         | 2340                      | 0.9859          |
| AZ22CA                             | BS          | 7         | 1455                      | 0.97595         |
| AZ22CB                             | BS          | 7         | 1781                      | 0.98596         |
| AZ22CC                             | BS          | 7         | 2349                      | 0.98255         |
| AZ2A1A                             | AS          | 5.7       | 1674                      | 0.96535         |
| AZ2A1B                             | AS          | 5.7       | 3038                      | 0.97696         |
| AZ2A1C                             | AS          | 5.7       | 3749                      | 0.97893         |
| AZ2A2A                             | DP          | 5.7       | 2102                      | 0.97193         |
| AZ2A2B                             | DP          | 5.7       | 1729                      | 0.97629         |
| AZ2A2C                             | DP          | 5.7       | 1580                      | 0.97278         |

|        |    |     |      |         |
|--------|----|-----|------|---------|
| AZ2B1A | AS | 5.7 | 2110 | 0.9654  |
| AZ2B1B | AS | 5.7 | 5926 | 0.98701 |
| AZ2B1C | AS | 5.7 | 4915 | 0.98454 |
| AZ2B2A | DP | 5.7 | 432  | 0.9213  |
| AZ2B2B | DP | 5.7 | 525  | 0.92571 |
| AZ2B2C | DP | 5.7 | 948  | 0.96097 |
| AZ2C1A | AS | 5.7 | 2613 | 0.97551 |
| AZ2C1B | AS | 5.7 | 4618 | 0.98506 |
| AZ2C1C | AS | 5.7 | 5276 | 0.98711 |
| AZ2C2A | DP | 5.7 | 2172 | 0.97836 |
| AZ2C2B | DP | 5.7 | 1692 | 0.97104 |
| AZ2C2C | DP | 5.7 | 908  | 0.95595 |
| AZ3A1B | AS | 7   | 3629 | 0.99421 |
| AZ3A1C | AS | 7   | 3336 | 0.99221 |
| AZ3A2A | DP | 7   | 1500 | 0.97933 |
| AZ3A2B | DP | 7   | 1111 | 0.9766  |
| AZ3A2C | DP | 7   | 744  | 0.97312 |
| AZ3B1A | AS | 7   | 2620 | 0.99084 |
| AZ3B1B | AS | 7   | 2105 | 0.98432 |
| AZ3B1C | AS | 7   | 2496 | 0.99159 |
| AZ3B2A | DP | 7   | 1466 | 0.97681 |
| AZ3B2B | DP | 7   | 1931 | 0.97566 |
| AZ3B2C | DP | 7   | 667  | 0.96702 |
| AZ3C1A | AS | 7   | 3329 | 0.99039 |
| AZ3C1B | AS | 7   | 1738 | 0.97296 |
| AZ3C1C | AS | 7   | 1933 | 0.9762  |
| AZ3C2A | DP | 7   | 1430 | 0.97273 |
| AZ3C2B | DP | 7   | 2419 | 0.98429 |
| AZ42AA | BS | 4   | 4831 | 0.98675 |
| AZ42AB | BS | 4   | 6292 | 0.9911  |
| AZ42AC | BS | 4   | 6376 | 0.992   |
| AZ42BA | BS | 4   | 4942 | 0.98988 |
| AZ42BB | BS | 4   | 8929 | 0.99474 |
| AZ42BC | BS | 4   | 6041 | 0.99073 |
| AZ42CA | BS | 4   | 4075 | 0.98479 |
| AZ42CB | BS | 4   | 3534 | 0.98246 |
| AZ42CC | BS | 4   | 1768 | 0.96041 |
| AZ4A1A | AS | 9   | 1938 | 0.98916 |
| AZ4A1B | AS | 9   | 2083 | 0.99232 |
| AZ4A1C | AS | 9   | 2412 | 0.98922 |
| AZ4A2A | DP | 9   | 1004 | 0.98606 |
| AZ4A2B | DP | 9   | 874  | 0.97941 |
| AZ4A2C | DP | 9   | 2124 | 0.98776 |
| AZ4B1A | AS | 9   | 1116 | 0.97491 |

|         |    |    |      |         |
|---------|----|----|------|---------|
| AZ4B1B  | AS | 9  | 2642 | 0.98713 |
| AZ4B1C  | AS | 9  | 3207 | 0.98909 |
| AZ4B2A  | DP | 9  | 1464 | 0.97951 |
| AZ4B2B  | DP | 9  | 804  | 0.96144 |
| AZ4C1A  | AS | 9  | 1316 | 0.9734  |
| AZ4C1B  | AS | 9  | 915  | 0.97596 |
| AZ4C2A  | DP | 9  | 220  | 0.87273 |
| AZ4C2B  | DP | 9  | 778  | 0.96401 |
| AZ4C2C  | DP | 9  | 3073 | 0.98959 |
| AZ4C3A  | DP | 9  | 1973 | 0.98834 |
| AZ52AA  | BS | 9  | 584  | 0.94863 |
| AZ52AB  | BS | 9  | 1274 | 0.98116 |
| AZ52AC  | BS | 9  | 1546 | 0.98124 |
| AZ52BA  | BS | 9  | 2122 | 0.97455 |
| AZ52BB  | BS | 9  | 3161 | 0.98671 |
| AZ52BC  | BS | 9  | 5400 | 0.99259 |
| AZ52CA  | BS | 9  | 5797 | 0.98999 |
| AZ52CB  | BS | 9  | 6168 | 0.99092 |
| AZ52CC  | BS | 9  | 2428 | 0.97446 |
| AZ5A1A  | AS | 13 | 3855 | 0.98859 |
| AZ5A1B  | AS | 13 | 4078 | 0.98847 |
| AZ5A2A  | DP | 13 | 1795 | 0.98552 |
| AZ5A2A5 | DP | 13 | 1235 | 0.97895 |
| AZ5A2B  | DP | 13 | 1578 | 0.98859 |
| AZ5A2B5 | DP | 13 | 1138 | 0.98067 |
| AZ5A2C  | DP | 13 | 1469 | 0.98026 |
| AZ5A2C5 | DP | 13 | 961  | 0.97294 |
| AZ5B1A  | AS | 13 | 3279 | 0.98719 |
| AZ5B1B  | AS | 13 | 2190 | 0.97717 |
| AZ5B1C  | AS | 13 | 1028 | 0.96595 |
| AZ5B2B  | DP | 13 | 1991 | 0.97338 |
| AZ5B2C  | DP | 13 | 1074 | 0.94879 |
| AZ5C1A  | AS | 13 | 867  | 0.96194 |
| AZ5C1B  | AS | 13 | 3567 | 0.98879 |
| AZ5C1C  | AS | 13 | 2436 | 0.97989 |
| AZ5C2A  | DP | 13 | 1116 | 0.96953 |
| AZ5C2B  | DP | 13 | 1388 | 0.97695 |
| AZ5C2C  | DP | 13 | 2459 | 0.97275 |
| AZ63AA  | BS | 13 | 5223 | 0.98775 |
| AZ63AB  | BS | 13 | 4955 | 0.99233 |
| AZ63AC  | BS | 13 | 5187 | 0.99132 |
| AZ63BA  | BS | 13 | 1484 | 0.95148 |
| AZ63BB  | BS | 13 | 2202 | 0.97275 |
| AZ63BC  | BS | 13 | 6970 | 0.98938 |

|                    |    |     |       |         |
|--------------------|----|-----|-------|---------|
| AZ63CA             | BS | 13  | 1500  | 0.96067 |
| AZ63CB             | BS | 13  | 1228  | 0.94055 |
| AZ63CC             | BS | 13  | 3199  | 0.98281 |
| <b>Giessenburg</b> |    |     |       |         |
| GB1LA              | DP | 2   | 5337  | 0.982   |
| GB1LB              | DP | 2   | 4805  | 0.982   |
| GB1LC              | DP | 2   | 6432  | 0.986   |
| GB1PL2LB           | DP | 2   | 5984  | 0.979   |
| GB1PL2LC           | DP | 2   | 5459  | 0.979   |
| GB1PL2MB           | DP | 2   | 3018  | 0.967   |
| GB1PL2MC           | DP | 2   | 8242  | 0.99    |
| GB1PL2RB           | DP | 2   | 5243  | 0.98    |
| GB1PL2RC           | DP | 2   | 9045  | 0.99    |
| GB1RA              | DP | 2   | 4487  | 0.971   |
| GB1RB              | DP | 2   | 6556  | 0.982   |
| GB1RC              | DP | 2   | 5618  | 0.981   |
| GB2LA              | DP | 3.5 | 3809  | 0.968   |
| GB2LB              | DP | 3.5 | 10484 | 0.99    |
| GB2LC              | DP | 3.5 | 4695  | 0.974   |
| GB2MA              | DP | 3.5 | 10868 | 0.991   |
| GB2MB              | DP | 3.5 | 4432  | 0.98    |
| GB2MC              | DP | 3.5 | 7195  | 0.986   |
| GB2PL2LA           | DP | 3.5 | 12588 | 0.993   |
| GB2PL2LB           | DP | 3.5 | 7003  | 0.986   |
| GB2PL2LC           | DP | 3.5 | 8105  | 0.988   |
| GB2PL2MA           | DP | 3.5 | 3226  | 0.97    |
| GB2PL2MB           | DP | 3.5 | 1240  | 0.945   |
| GB2PL2MC           | DP | 3.5 | 5332  | 0.98    |
| GB2PL2RA           | DP | 3.5 | 3139  | 0.973   |
| GB2PL2RB           | DP | 3.5 | 4465  | 0.984   |
| GB2PL2RC           | DP | 3.5 | 2430  | 0.968   |
| GB2RA              | DP | 3.5 | 8930  | 0.989   |
| GB2RB              | DP | 3.5 | 5415  | 0.977   |
| GB2RC              | DP | 3.5 | 4173  | 0.974   |
| GB3LA              | DP | 4.5 | 2947  | 0.958   |
| GB3LB              | DP | 4.5 | 4261  | 0.973   |
| GB3LC              | DP | 4.5 | 3092  | 0.966   |
| GB3MA1             | DP | 4.5 | 3509  | 0.982   |
| GB3MA2             | DP | 4.5 | 5974  | 0.987   |
| GB3MB              | DP | 4.5 | 3421  | 0.972   |
| GB3PL2LA           | DP | 4.5 | 2820  | 0.963   |
| GB3PL2LB           | DP | 4.5 | 8455  | 0.989   |
| GB3PL2LC           | DP | 4.5 | 8551  | 0.986   |
| GB3PL2MB           | DP | 4.5 | 3652  | 0.979   |



|                             |    |     |       |       |
|-----------------------------|----|-----|-------|-------|
| GB3PL2MC                    | DP | 4.5 | 3638  | 0.978 |
| GB3PL2RA                    | DP | 4.5 | 2112  | 0.959 |
| GB3PL2RB                    | DP | 4.5 | 6159  | 0.986 |
| GB3PL2RC                    | DP | 4.5 | 5194  | 0.98  |
| GBBLA                       | DP | 1   | 3510  | 0.981 |
| GBBLB                       | DP | 1   | 5455  | 0.987 |
| GBBLC                       | DP | 1   | 6575  | 0.988 |
| GBBMA                       | DP | 1   | 6259  | 0.985 |
| GBBMB                       | DP | 1   | 6634  | 0.986 |
| GBBMC                       | DP | 1   | 8101  | 0.989 |
| GBBRA                       | DP | 1   | 9961  | 0.991 |
| GBBRB                       | DP | 1   | 7361  | 0.984 |
| GBBRC                       | DP | 1   | 8908  | 0.991 |
| GBBS1A                      | BS | 2   | 11147 | 0.993 |
| GBBS1B                      | BS | 2   | 5380  | 0.978 |
| GBBS1C                      | BS | 2   | 10274 | 0.992 |
| GBBS2A                      | BS | 3.5 | 4863  | 0.986 |
| GBBS2B                      | BS | 3.5 | 3014  | 0.979 |
| GBBS2C                      | BS | 3.5 | 2639  | 0.976 |
| GBBS3A                      | BS | 4.5 | 4427  | 0.977 |
| GBBS3B                      | BS | 4.5 | 4826  | 0.973 |
| GBBS3C                      | BS | 4.5 | 6814  | 0.985 |
| GBSH1A                      | BS | 2   | 4354  | 0.975 |
| GBSH1B                      | BS | 2   | 11029 | 0.992 |
| GBSH1C                      | BS | 2   | 10842 | 0.993 |
| GBSH2A                      | BS | 3.5 | 12058 | 0.992 |
| GBSH2B                      | BS | 3.5 | 9234  | 0.988 |
| GBSH2C                      | BS | 3.5 | 9559  | 0.989 |
| GBSH3A                      | BS | 4.5 | 10130 | 0.991 |
| GBSH3B                      | BS | 4.5 | 11372 | 0.991 |
| GBSH3C                      | BS | 4.5 | 9152  | 0.99  |
| <b>Hollandse Ijsselkade</b> |    |     |       |       |
| HI_A_1BA                    | DP | 0.3 | 7637  | 0.995 |
| HI_A_1BB                    | DP | 0.3 | 1277  | 0.973 |
| HI_A_1BC                    | DP | 0.3 | 1559  | 0.979 |
| HI_A_1TA                    | AS | 0.3 | 9619  | 0.996 |
| HI_A_1TB                    | AS | 0.3 | 10175 | 0.996 |
| HI_A_1TC                    | AS | 0.3 | 7085  | 0.994 |
| HI_A_2BA                    | DP | 1   | 10954 | 0.996 |
| HI_A_2BB                    | DP | 1   | 11561 | 0.996 |
| HI_A_2BC                    | DP | 1   | 10571 | 0.996 |
| HI_A_2TA                    | AS | 1   | 8941  | 0.996 |
| HI_A_2TB                    | AS | 1   | 9704  | 0.997 |
| HI_A_2TC                    | AS | 1   | 9334  | 0.996 |

|                        |    |     |       |       |
|------------------------|----|-----|-------|-------|
| HI_A_3BA               | DP | 1.7 | 10751 | 0.996 |
| HI_A_3BB               | DP | 1.7 | 17327 | 0.998 |
| HI_A_3BC               | DP | 1.7 | 18104 | 0.998 |
| HI_A_3TA               | AS | 1.7 | 5255  | 0.995 |
| HI_A_3TB               | AS | 1.7 | 12072 | 0.997 |
| HI_A_3TC               | AS | 1.7 | 12121 | 0.998 |
| HI_A_4A                | DP | 3   | 13215 | 0.997 |
| HI_A_4B                | DP | 3   | 19284 | 0.997 |
| HI_A_4C                | DP | 3   | 3056  | 0.986 |
| HI_BULK_1A             | BS | 0.3 | 7704  | 0.994 |
| HI_BULK_1B             | BS | 0.3 | 11176 | 0.997 |
| HI_BULK_1C             | BS | 0.3 | 10803 | 0.996 |
| HI_BULK_2A             | BS | 1   | 8982  | 0.996 |
| HI_BULK_2C             | BS | 1   | 18037 | 0.998 |
| HI_BULK_3A             | BS | 1.7 | 5091  | 0.995 |
| HI_B_1BA               | DP | 0.3 | 3682  | 0.991 |
| HI_B_1BB               | DP | 0.3 | 11384 | 0.996 |
| HI_B_1BC               | DP | 0.3 | 10178 | 0.996 |
| HI_B_1TA               | AS | 0.3 | 13532 | 0.997 |
| HI_B_1TB               | AS | 0.3 | 4266  | 0.991 |
| HI_B_1TC               | AS | 0.3 | 7490  | 0.995 |
| HI_B_2BA               | DP | 1   | 5841  | 0.994 |
| HI_B_2BB               | DP | 1   | 54380 | 0.999 |
| HI_B_2BC               | DP | 1   | 64422 | 1     |
| HI_B_2TA               | AS | 1   | 4627  | 0.993 |
| HI_B_2TB               | AS | 1   | 7546  | 0.994 |
| HI_B_2TC               | AS | 1   | 6023  | 0.993 |
| HI_B_3BA               | DP | 1.7 | 11994 | 0.997 |
| HI_B_3BB               | DP | 1.7 | 87    | 0.92  |
| HI_B_3BC               | DP | 1.7 | 9546  | 0.995 |
| HI_B_3TA               | AS | 1.7 | 6094  | 0.994 |
| HI_B_3TB               | AS | 1.7 | 11667 | 0.996 |
| HI_B_3TC               | AS | 1.7 | 10665 | 0.995 |
| HI_B_4A                | DP | 3   | 6509  | 0.994 |
| HI_B_4B                | DP | 3   | 7489  | 0.996 |
| HI_B_4C                | DP | 3   | 6677  | 0.996 |
| <b>Nieuwlekkerland</b> |    |     |       |       |
| NLL1AS1                | DP | 15  | 153   | 0.784 |
| NLL1AS2                | DP | 15  | 123   | 0.724 |
| NLL1AS3                | DP | 15  | 296   | 0.818 |
| NLL1BS1                | DP | 15  | 180   | 0.739 |
| NLL1BS2                | DP | 15  | 308   | 0.792 |
| NLL1BS3                | DP | 15  | 375   | 0.795 |
| NLL1BULKS1             | BS | 15  | 6695  | 0.987 |

|            |    |    |       |       |
|------------|----|----|-------|-------|
| NLL1BULKS2 | BS | 15 | 4895  | 0.981 |
| NLL1BULKS3 | BS | 15 | 2402  | 0.963 |
| NLL1CS1    | AS | 15 | 213   | 0.84  |
| NLL1CS2    | AS | 15 | 521   | 0.856 |
| NLL1CS3    | AS | 15 | 218   | 0.817 |
| NLL1PL2S1  | DP | 15 | 245   | 0.767 |
| NLL1PL2S2  | DP | 15 | 159   | 0.774 |
| NLL1PL2S3  | DP | 15 | 128   | 0.773 |
| NLL22AS1   | DP | 10 | 166   | 0.729 |
| NLL22AS2   | DP | 10 | 443   | 0.86  |
| NLL22AS3   | DP | 10 | 174   | 0.747 |
| NLL22BS1   | DP | 10 | 1617  | 0.949 |
| NLL22BS2   | DP | 10 | 3225  | 0.976 |
| NLL22BS3   | DP | 10 | 3397  | 0.973 |
| NLL22CS1   | DP | 10 | 900   | 0.892 |
| NLL22CS2   | DP | 10 | 860   | 0.897 |
| NLL22CS3   | DP | 10 | 745   | 0.89  |
| NLL2A2S1   | AS | 10 | 3051  | 0.984 |
| NLL2A2S2   | AS | 10 | 5748  | 0.993 |
| NLL2A2S3   | AS | 10 | 5918  | 0.993 |
| NLL2B2S1   | AS | 10 | 6987  | 0.985 |
| NLL2B2S2   | AS | 10 | 9782  | 0.991 |
| NLL2B2S3   | AS | 10 | 14470 | 0.995 |
| NLL2BULKS1 | BS | 10 | 4449  | 0.98  |
| NLL2BULKS2 | BS | 10 | 6759  | 0.986 |
| NLL2BULKS3 | BS | 10 | 3753  | 0.975 |
| NLL2C2S1   | AS | 10 | 5550  | 0.985 |
| NLL2C2S2   | AS | 10 | 5578  | 0.98  |
| NLL2C2S3   | AS | 10 | 6172  | 0.981 |
| NLL2PL2S1  | DP | 10 | 618   | 0.859 |
| NLL2PL2S2  | DP | 10 | 1857  | 0.941 |
| NLL2PL2S3  | DP | 10 | 1735  | 0.954 |
| NLL2SS1    | AS | 10 | 4322  | 0.974 |
| NLL2SS2    | AS | 10 | 993   | 0.932 |
| NLL2SS3    | AS | 10 | 410   | 0.888 |
| NLL3AS1    | DP | 7  | 2624  | 0.959 |
| NLL3AS2    | DP | 7  | 3052  | 0.97  |
| NLL3AS3    | DP | 7  | 2219  | 0.958 |
| NLL3BS1    | DP | 7  | 1947  | 0.957 |
| NLL3BS2    | DP | 7  | 2340  | 0.962 |
| NLL3BS3    | DP | 7  | 1843  | 0.946 |
| NLL3BULKS1 | BS | 7  | 4713  | 0.983 |
| NLL3BULKS2 | BS | 7  | 6334  | 0.985 |
| NLL3BULKS3 | BS | 7  | 4427  | 0.981 |

|            |    |   |      |       |
|------------|----|---|------|-------|
| NLL3CS1    | DP | 7 | 2050 | 0.957 |
| NLL3CS2    | DP | 7 | 3178 | 0.972 |
| NLL3CS3    | DP | 7 | 2954 | 0.964 |
| NLL3GS1    | AS | 7 | 3722 | 0.974 |
| NLL3GS2    | AS | 7 | 3513 | 0.972 |
| NLL3GS3    | AS | 7 | 3318 | 0.969 |
| NLL3PL2S1  | DP | 7 | 552  | 0.833 |
| NLL3PL2S2  | DP | 7 | 755  | 0.883 |
| NLL3PL2S3  | DP | 7 | 994  | 0.904 |
| NLL4AS1    | DP | 3 | 2756 | 0.963 |
| NLL4AS2    | DP | 3 | 3198 | 0.971 |
| NLL4AS3    | DP | 3 | 3585 | 0.979 |
| NLL4BS1    | DP | 3 | 3116 | 0.97  |
| NLL4BS2    | DP | 3 | 2818 | 0.967 |
| NLL4BS3    | DP | 3 | 2194 | 0.954 |
| NLL4BULKS1 | BS | 3 | 2699 | 0.972 |
| NLL4BULKS2 | BS | 3 | 4229 | 0.982 |
| NLL4BULKS3 | BS | 3 | 4671 | 0.977 |
| NLL4CS16   | DP | 3 | 3740 | 0.976 |
| NLL4CS17   | DP | 3 | 3149 | 0.971 |
| NLL4CS26   | DP | 3 | 6351 | 0.986 |
| NLL4CS27   | DP | 3 | 5280 | 0.984 |
| NLL4CS36   | DP | 3 | 1974 | 0.948 |
| NLL4CS37   | DP | 3 | 1682 | 0.944 |
| NLL4GS1    | AS | 3 | 3345 | 0.97  |
| NLL4GS2    | AS | 3 | 5114 | 0.983 |
| NLL4GS3    | AS | 3 | 9767 | 0.992 |
| NLL4PL2S2  | DP | 3 | 3379 | 0.97  |
| NLL4PL2S3  | DP | 3 | 5006 | 0.979 |
| NLL5AS1    | DP | 1 | 5118 | 0.987 |
| NLL5AS2    | DP | 1 | 6445 | 0.991 |
| NLL5AS3    | DP | 1 | 6764 | 0.991 |
| NLL5BS1    | DP | 1 | 6600 | 0.989 |
| NLL5BS2    | DP | 1 | 3706 | 0.976 |
| NLL5BS3    | DP | 1 | 3782 | 0.982 |
| NLL5BULKS1 | BS | 1 | 5555 | 0.987 |
| NLL5BULKS2 | BS | 1 | 4813 | 0.985 |
| NLL5BULKS3 | BS | 1 | 4415 | 0.984 |
| NLL5CS1    | DP | 1 | 1785 | 0.959 |
| NLL5CS2    | DP | 1 | 4595 | 0.987 |
| NLL5CS3    | DP | 1 | 5147 | 0.988 |
| NLL5GS1    | AS | 1 | 2809 | 0.974 |
| NLL5GS2    | AS | 1 | 4902 | 0.986 |
| NLL5GS3    | AS | 1 | 4955 | 0.984 |

|                   |    |      |       |       |
|-------------------|----|------|-------|-------|
| NLLA1S1           | AS | 15   | 5697  | 0.991 |
| NLLA1S2           | AS | 15   | 4967  | 0.989 |
| NLLA1S3           | AS | 15   | 8456  | 0.995 |
| NLLB1S1           | AS | 15   | 8769  | 0.99  |
| NLLB1S2           | AS | 15   | 2634  | 0.954 |
| NLLB1S3           | AS | 15   | 3569  | 0.966 |
| NLLC1S1           | DP | 15   | 7228  | 0.985 |
| NLLC1S2           | DP | 15   | 7742  | 0.989 |
| NLLC1S3           | DP | 15   | 6202  | 0.985 |
| <b>Westerkade</b> |    |      |       |       |
| WK_1_AA           | DP | 11.5 | 3503  | 0.982 |
| WK_1_AB           | DP | 11.5 | 8150  | 0.988 |
| WK_1_AC           | DP | 11.5 | 13833 | 0.994 |
| WK_1_BA           | DP | 11.5 | 17706 | 0.997 |
| WK_1_BB           | DP | 11.5 | 17299 | 0.997 |
| WK_1_BC           | DP | 11.5 | 16043 | 0.996 |
| WK_1_CA           | DP | 11.5 | 8586  | 0.993 |
| WK_2_AA           | DP | 9.5  | 9310  | 0.994 |
| WK_2_AB           | DP | 9.5  | 6259  | 0.988 |
| WK_2_AC           | DP | 9.5  | 4548  | 0.989 |
| WK_2_BA           | DP | 9.5  | 9380  | 0.993 |
| WK_2_BC           | DP | 9.5  | 6444  | 0.99  |
| WK_3_AB           | DP | 7.5  | 8091  | 0.995 |
| WK_3_AC           | DP | 7.5  | 13258 | 0.996 |
| WK_3_BA           | DP | 7.5  | 8059  | 0.991 |
| WK_3_BB           | DP | 7.5  | 15546 | 0.995 |
| WK_3_BC           | DP | 7.5  | 7375  | 0.99  |
| WK_3_CA           | DP | 7.5  | 8899  | 0.992 |
| WK_3_CB           | DP | 7.5  | 11025 | 0.993 |
| WK_3_CC           | DP | 7.5  | 20569 | 0.996 |
| WK_4_AA           | DP | 4.5  | 12910 | 0.994 |
| WK_4_AB           | DP | 4.5  | 4977  | 0.983 |
| WK_4_AC           | DP | 4.5  | 16380 | 0.995 |
| WK_4_BA           | DP | 4.5  | 7574  | 0.99  |
| WK_4_BB           | DP | 4.5  | 3229  | 0.979 |
| WK_4_BC           | DP | 4.5  | 17724 | 0.996 |
| WK_4_CA           | DP | 4.5  | 8130  | 0.99  |
| WK_4_CB           | DP | 4.5  | 2575  | 0.976 |
| WK_4_CC           | DP | 4.5  | 13211 | 0.995 |
| WK_5_AA           | DP | 2.5  | 7554  | 0.988 |
| WK_5_BA           | DP | 2.5  | 15694 | 0.997 |
| WK_5_BB           | DP | 2.5  | 18468 | 0.997 |
| WK_5_BC           | DP | 2.5  | 7289  | 0.991 |
| WK_5_CA           | DP | 2.5  | 12940 | 0.995 |

|         |    |     |       |       |
|---------|----|-----|-------|-------|
| WK_5_CB | DP | 2.5 | 10026 | 0.993 |
| WK_5_CC | DP | 2.5 | 11154 | 0.995 |
| WK_6_AA | DP | 1.5 | 20412 | 0.997 |
| WK_6_AB | DP | 1.5 | 26213 | 0.997 |
| WK_6_AC | DP | 1.5 | 23287 | 0.997 |
| WK_6_BA | DP | 1.5 | 15867 | 0.995 |
| WK_6_BB | DP | 1.5 | 14564 | 0.996 |
| WK_6_BC | DP | 1.5 | 13250 | 0.995 |
| WK_6_CA | DP | 1.5 | 16277 | 0.994 |
| WK_7_AA | DP | 0.5 | 16601 | 0.997 |
| WK_7_AB | DP | 0.5 | 21165 | 0.997 |
| WK_7_AC | DP | 0.5 | 16105 | 0.995 |
| WK_7_BA | DP | 0.5 | 13559 | 0.995 |
| WK_7_BB | DP | 0.5 | 18853 | 0.996 |
| WK_7_BC | DP | 0.5 | 16833 | 0.995 |

---
